# Supplementary material for: South Asia ammonia emission inversion through assimilating IASI observations
Source: Copernicus journal article supplement (doi:10.5194/egusphere-2024-3938), 2025-01-20

## Authors' Response to Reviews of

## South Asia ammonia emission inversion through assimilating

## IASI observations

Ji Xia\*, Yi Zhou\*, Li Fang, Yingfei Qi, Dehao Li, Hong Liao, and Jianbing Jin

*Atmospheric Chemistry and Physics Discussions,*

---

RC: Reviewers' Comment, AR: Authors' Response, □ Manuscript Text

### General Comments:

**RC:** *This paper focuses on optimizing the CEDS NH<sub>3</sub> emission inventory using a top-down inversion system (4D<sub>En</sub>Var) over South Asia. The authors have previously conducted a similar work in China (published in ERL), but they highlight several novelties in this study:*

- 1. The application of the IASI averaging kernel to derive NH<sub>3</sub> column concentrations;*
- 2. A relatively high spatial resolution NH<sub>3</sub> emission inversion over South Asia (0.5° × 0.625°);*
- 3. The identification of a "double-peak" seasonal pattern difference between prior and posterior emissions.*

*Overall, while the study's scope aligns well with the journal ACP and contributes to advancing the field by improving top-down NH<sub>3</sub> emissions over South Asia*

Response to Referee #1: We would like to thank the referee for the careful review throughout the paper and the in-depth comments that help to improve our paper.

### Specific Comments:

**RC:** *1) Clarify the use of observations and simulations: The use of IASI and CrIS observations, along with GEOS-Chem simulations, should be more clearly outlined. For example, a table could be included summarizing the exact periods covered by each dataset (i.e., 2015-2023, 4 months in 2019), their respective roles in the study, and the purposes they serve. Additionally, the data filtering process for removing irrational values should be more rigorously justified, particularly regarding skin temperature and cloud fraction considerations. Comparisons between IASI, CrIS, or previous studies could help validate the dataset selection.*

**AR:** Thanks for comment. We have integrated the relevant information into a table and added it to the manuscript. Additionally, we have added the previously omitted cloud fraction filtering

information in the manuscript, and re-calculated the IASI dataset using the skin temperature condition. Details are below:

***Text in manuscript***

The assimilated observations for estimating the NH<sub>3</sub> emissions were the monthly IASI column concentration means over the 0.5 ° × 0.625 ° GEOS-Chem grid cell. These values were derived from the latest ANNI-NH<sub>3</sub>-v4R-ERA5 product. Despite improvements in NH<sub>3</sub> column retrievals from satellite observations, there remains substantial variability in measurement uncertainty, ranging from 5 % to over 1000 %. (Van Damme et al., 2014b; Whitburn et al., 2016; Van Damme et al., 2017). Data selection was performed by excluding nighttime observations, irrational values ( $<0$ ), and only using data with a cloud fraction  $< 0.1$  (Van Damme et al., 2018) and skin temperature  $> 263$  K (Van Damme et al., 2014a) during the calculation of the monthly mean. It is important to note that the time coverage of the available version 4 IASI product used was limited: Metop-A provided data for the entire year of 2019, Metop-B provided data from January to July 2019, and Metop-C did not have data for 2019. Therefore, only the data from Metop-A and Metop-B within the 2019 time frame were used in this study.

| Data         | Period      | Use                                               |
|--------------|-------------|---------------------------------------------------|
| IASI v3      | 2015-2023   | Annual variation of NH <sub>3</sub> concentration |
| IASI v4      | entire 2019 | Inversion and Validation                          |
| Level 2 CrIS | entire 2019 | Independent validation                            |
| CPCB         | entire 2019 | Independent validation                            |
| GEOS-Chem    | entire 2019 | Simulation                                        |

**Table 1.** The use of observations and simulations

**RC:** 2) *Present results in a logical sequence: The results section could benefit from a clearer structure. It might be more intuitive to first present the analysis of observed NH<sub>3</sub> concentrations (Sec. 3.1.1 and 3.2) before discussing the spatial and temporal patterns of NH<sub>3</sub> emissions. Then followed by the validation with the concentration inferred using the inversion.*

**AR:** Thanks for the in-depth comment. In response to your suggestion, I have revised the logical sequence of the sections in the manuscript. The following is the revised section sequence:

***Text in manuscript***

- 3 Results and discussion
- 3.1 Observed NH<sub>3</sub> concentrations
- 3.1.1 Spatial NH<sub>3</sub> total column concentration

|                                                                             |
|-----------------------------------------------------------------------------|
| 3.1.2 Seasonal and annual variation of NH <sub>3</sub> concentration        |
| 3.2 Spatial and Seasonal variation of NH <sub>3</sub> emission              |
| 3.3 Validation                                                              |
| 3.3.1 NH <sub>3</sub> total column concentration validation                 |
| 3.3.2 NH <sub>3</sub> and PM <sub>2.5</sub> ground concentration validation |

**RC: 3) Strengthen the discussion:** *The discussion should delve deeper into the reasons behind the changes in the seasonal patterns observed in the posterior emissions compared to the prior. Supporting this analysis with additional figures in either the main text or supplementary materials would be valuable. For instance, including information on:*

- *Seasonal fertilizer application timings for major crops like rice, corn, and wheat;*
- *Meteorological factors affecting NH<sub>3</sub> volatilization and deposition, such as temperature and precipitation;*
- *Biomass burning patterns in 2019, as they may influence spatial and seasonal variations of NH<sub>3</sub> emissions and concentrations.*

**AR:** Appreciate your comment. We have added the meteorological conditions, such as precipitation and temperature, as well as the seasonal variations in biomass burning, to the supplementary materials. Additionally, the trend of anthropogenic ammonia emissions is mainly attributed to agricultural activities, so the changes in anthropology emissions generally correspond to the planting times of crops. We have identified the planting and harvesting times of crops in the South Asia region from USDA(U.S.DEPARTMENT OF AGRICULTURE, [https://ipad.fas.usda.gov/rssiws/al/crop\\_calendar/sasia.aspx](https://ipad.fas.usda.gov/rssiws/al/crop_calendar/sasia.aspx)). The detailed emission analysis in revised manuscript is as follows:

***Text in manuscript***

***3.1.2 Seasonal and annual variation of NH<sub>3</sub> concentration***

...

The high value in May is attributed to huge amount of biomass burning in South Asia during the spring in Figure S4 (c). We have identified the planting and harvesting times of crops in the South Asia region from USDA(U.S.DEPARTMENT OF AGRICULTURE, [https://ipad.fas.usda.gov/rssiws/al/crop\\_calendar/sasia.aspx](https://ipad.fas.usda.gov/rssiws/al/crop_calendar/sasia.aspx)). The heavy use of fertilizers in agricultural activities has resulted in the highest emission throughout the year, as will be illustrated in Fig. 4 (b) in Section 3.2. This has lead to the second NH<sub>3</sub> concentration peak in July. The reasons for higher emissions in July but lower concentration levels compared to May could be attributed to meteorological factors. The monsoon season in South Asia results in increased wet deposition, and

notably, 2019 experienced the most intense monsoon since 1994 (NASA, 2020). As shown in the Figure S4 (a) and (b), precipitation and temperature in July are the highest of the year. High temperatures increase ammonia volatilization, and the high precipitation increases the wet deposition of ammonia. These combined factors lead to July having a smaller concentration peak compared to May, despite being another peak month.

...

### 3.2 Spatial and Seasonal variation of $\text{NH}_3$ emission

...

The substantial emissions in July, as indicated by the posterior inventory, can be attributed to the increased fertilizer application for rice and corn crops during the summer season (Tanvir et al., 2019). Although biomass burning emissions are generally higher in spring in Figure S4 (c), agricultural activities remain the primary contributors to  $\text{NH}_3$  emissions (Huang et al., 2016), resulting in July surpassing May in emission intensity. From July to September, as rice and other crops progress through their growth stages, fertilizer application typically decreases, leading to a gradual reduction in  $\text{NH}_3$  emissions. Additionally, temperatures decline from August to September in Figure S4 (b), reducing the volatilization rate of  $\text{NH}_3$ . This pattern occurs because  $\text{NH}_3$  volatilization is strongly influenced by temperature (Fan et al., 2011)

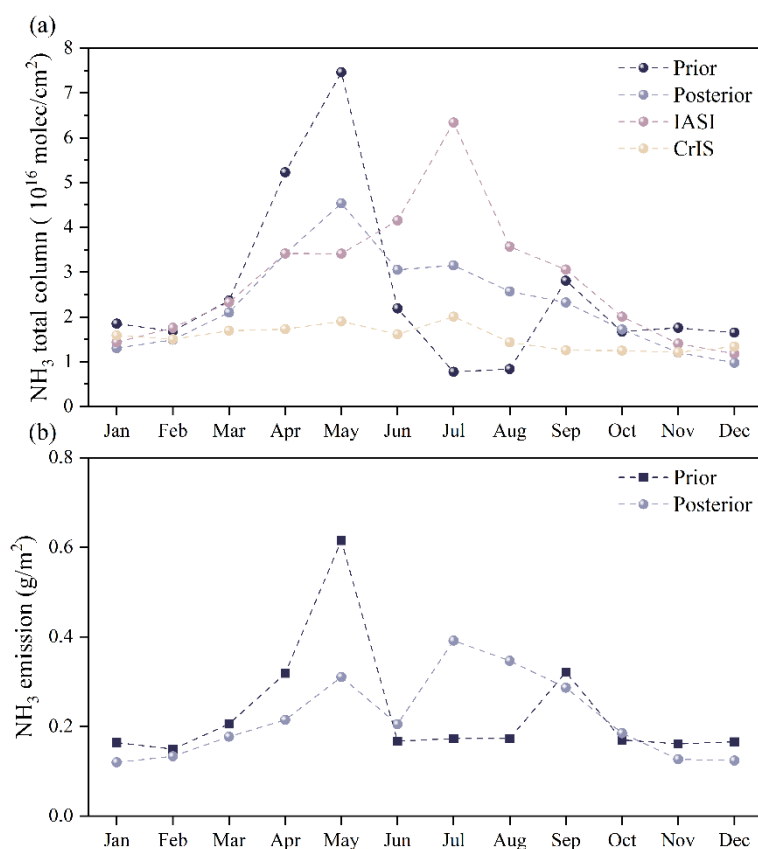

Figure 4. The monthly average total  $\text{NH}_3$  column concentrations from the prior and posterior, IASI-observed, and CrIS-observed from January to December (a). The monthly average values of

prior and posterior emissions from January to December (b).

### Supplement

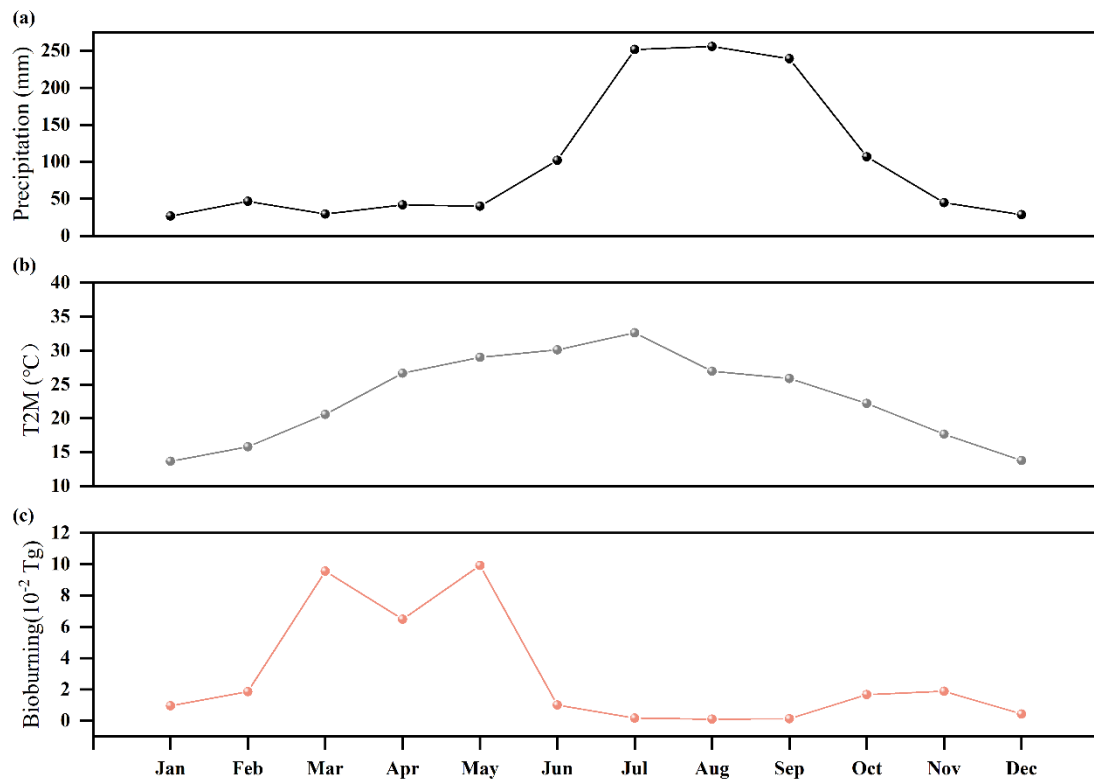

Figure S4. Monthly precipitation (a), temperature (b) from MERRA2 and biomass burning emission (c) from GFED4 in 2019.

**RC: 4) Abstract:** *One interesting point of this study is the different 'double-peak' seasonal pattern from the CEDS prior. I would expect to highlight this point in the abstract and briefly talk about the potential reasons for this.*

**AR:** Thanks for the comment. I have revised the abstract to highlight the interesting finding of the "double-peak" seasonal pattern observed in this study, which differs from the CEDS prior. Additionally, I briefly discuss the potential reasons for this discrepancy in the revised abstract. The following is the revised abstract excerpt:

#### **Text in Abstract:**

Notably, emissions there exhibit a "double-peak" seasonal profile, with the maximum in July and the secondary peak in May. This differs from the "double-peak" trend suggested by the CEDS prior inventory, which identifies the maximum in May and a second peak in September. The differences may be attributed to a more accurate representation of regional agricultural practices, such as the

timing of fertilizer application and meteorological influences like precipitation and temperature.

**RC: 5) *The effect of NH<sub>3</sub> on climate change: inversed cause and effect, Sanderson et al., 2006 studied the effect of climate change on acid deposition. Consider reading more related and updated papers:***

**Gong, Cheng, et al. "Global net climate effects of anthropogenic reactive nitrogen." *Nature* 632.8025 (2024): 557-563.**

**Ma, Ruoya, et al. "Data-driven estimates of fertilizer-induced soil NH<sub>3</sub>, NO and N<sub>2</sub>O emissions from croplands in China and their climate change impacts." *Global Change Biology* 28.3 (2022): 1008-1022.**

**AR:** Many thanks for your feedback. I have reviewed the recommended papers and other related recent studies, and I have updated the manuscript accordingly blew:

***Text in manuscript :***

#### **1 Introduction**

Ammonia (NH<sub>3</sub>), an alkaline compound, has the capacity to react with acidic gases present in the atmosphere, thereby contributing to the formation of secondary aerosols, notably ammonium sulfate and ammonium nitrate (Jimenez et al., 2009). The genesis of fine atmospheric particulate matter poses significant threats to human health (Mukherjee and Agrawal, 2017). Further, ammonia gas, along with its reaction products, plays a pivotal role in soil acidification and the eutrophication of water bodies through both dry and wet deposition (Krupa, 2003), and thereby affecting the balance of ecosystems (Asman et al., 1998) and climate change (Ma et al., 2022; Gong et al., 2024).

**RC: 6) *NH<sub>3</sub> level over South Asia, I would expect to see the number of NH<sub>3</sub> concentrations or emissions here, as stated the highest in the world.***

**Reply:** I have updated the manuscript to include the specific NH<sub>3</sub> concentration data for South Asia. The specific revised excerpt is as follows.

***Text in manuscript :***

#### **1 Introduction**

...

With an enormous livestock population and extensive use of nitrogen fertilizers, South Asia has

experienced the highest level of atmospheric  $\text{NH}_3$  globally (Pawar et al., 2021b; Luo et al., 2022). Specifically, the annual average ammonia concentration across India is approximately  $1.8\text{--}5.6 \times 10^{16} \text{ mol/cm}^2$ , while in the Indo-Gangetic Plain (IGP) of India, the concentration is double that of other regions, reaching a peak of  $11.5 \times 10^{16} \text{ mol/cm}^2$  during the high season in July (Kuttippurath et al., 2020).

**RC: 7) Use  $\text{NH}_3$  instead of ammonia after the definition, which applies to the whole text.**

**AR:** Appreciate your comment. I have made the necessary revisions and replaced "ammonia" with " $\text{NH}_3$ " throughout the manuscript, following the initial definition.

**RC: 8) "the environmental impacts can be quantified" -> "enabling the quantification of environmental impacts"**

**AR:** Thanks for your comment. I have revised the sentence as per your recommendation, changing "the environmental impacts can be quantified" to "enabling the quantification of environmental impacts." The specific revised excerpt is as follows:

**Text in manuscript:**

# 1 Introduction

...

Over the past decade, scientists have predominantly employed the "bottom-up" approach to estimate  $\text{NH}_3$  emissions. When combined with chemical transport models, atmospheric  $\text{NH}_3$  dynamics can be simulated, enabling the quantification of environmental impacts.

....

**RC: 9) however, these bottom-up estimates of  $\text{NH}_3$  emissions are generally considered uncertain (Xu et al., 2019), especially compared to other pollutants mainly derived from fossil fuel combustion" -> However, these bottom-up estimates of  $\text{NH}_3$  emissions are generally considered as uncertain (Xu et al., 2019), particularly when compared to pollutants primarily originating from fossil fuel combustion, such as ...**

**AR:** Thanks for comment. I have revised the sentence as recommended, changing it to: "However, these bottom-up estimates of  $\text{NH}_3$  emissions are generally considered as uncertain (Xu et al., 2019), particularly when compared to pollutants primarily originating from fossil fuel combustion, such

as...". The specific revised excerpt is as follows:

***Text in manuscript :***

## **1 Introduction**

...

Over the past decade, scientists have predominantly employed the "bottom-up" approach to estimate NH<sub>3</sub> emissions. When combined with chemical transport models, atmospheric NH<sub>3</sub> dynamics can be simulated, enabling the quantification of environmental impacts. Substantial efforts have been made to quantify the spatiotemporal distribution of NH<sub>3</sub> sources and develop global/regional emission inventories, such as the global NH<sub>3</sub> emission inventory (Bouwman et al., 1997), the anthropogenic emission inventory that includes NH<sub>3</sub> estimates (e.g., Community Emissions Data System, CEDS) (Hoesly et al., 2018), as well as regional NH<sub>3</sub> inventories focusing on South Asia (Yan et al., 2003; Yamaji et al., 2004; Liu et al., 2022). However, these bottom-up estimates of NH<sub>3</sub> emissions are generally considered as uncertain (Xu et al., 2019), particularly when compared to pollutants primarily originating from fossil fuel combustion such as NO<sub>2</sub>.

***RC: 10) "limitations still remain": unclear what kind of limitations here.***

**AR:** I have clarified the statement regarding the limitations in the manuscript. The next sentence has been revised to explain more specifically that "These primarily arise from the fact that satellite observations can only measure column-integrated NH<sub>3</sub> concentrations, which do not directly reflect emission intensity or the three-dimensional concentration field." The specific revised excerpt is as follows:

***Text in manuscript :***

## **1 Introduction**

...

The rapid advancement of satellite remote sensing technology has resulted in an expanding array of valuable NH<sub>3</sub> products, such as those from the first satellite NH<sub>3</sub> observations using the Tropospheric Emission Spectrometer (TES) (Beer et al., 2008), as well as higher-resolution retrievals from the Infrared Atmospheric Sounding Interferometer (IASI) (Pawar et al., 2021b) and the Cross-track Infrared Sounder (CrIS) (Beale et al., 2022; Kharol et al., 2022). While these remote sensing measurements play a pivotal role in characterizing atmospheric NH<sub>3</sub> loading, limitations still remain. These primarily arise from the fact that satellite observations can only measure column-integrated NH<sub>3</sub> concentrations, which do not directly reflect emission intensity or the three-dimensional concentration field. In addition to these satellite-based data, very limited ground-based



observations are publicly available over South Asia, and those that do exist are constrained by their inadequate representation of atmospheric NH<sub>3</sub> features (Pawar et al., 2021b).

**RC: 11) Add a citation about your emission inversion system.**

**AR:** Thanks for comment. We have added the relevant citation for our emission inversion system in the manuscript (Jin et al., 2023). The updated sentence now reads: "The NH<sub>3</sub> emission inventory will be calculated using our newly developed emission inversion system (Jin et al., 2023)..."

**Text in manuscript :**

## 1 Introduction

...

However, there is a paucity of studies focusing on assimilation-based NH<sub>3</sub> emission inversion specific to South Asia, which has some of the highest NH<sub>3</sub> loading hotspots compared to other continents. In this study, we aim to explore the spatial and temporal features of NH<sub>3</sub> emissions over South Asia. The NH<sub>3</sub> emission inventory will be calculated using our newly developed emission inversion system (Jin et al., 2023), by assimilating NH<sub>3</sub> retrievals from the IASI instruments onboard 15 MetOp-A (operational from 2008 to 2018), MetOp-B (operational since 2012), and MetOp-C (operational since 2018) satellites.

**RC: 12) The description of emission inversion system and corresponding data could be shortened here and add more details in the data and method part.**

**AR:** Thank you for your valuable comment. The description of the emission inversion system and the corresponding data has been shortened here, and more details have been added in the data and method section. The specific revised excerpt is as follows:

**Text in manuscript :**

## 1 Introduction

...

However, there is a paucity of studies focusing on assimilation-based NH<sub>3</sub> emission inversion specific to South Asia, which has some of the highest NH<sub>3</sub> loading hotspots compared to other continents. In this study, we aim to explore the spatial and temporal features of NH<sub>3</sub> emissions over South Asia. The NH<sub>3</sub> emission inventory will be calculated using our newly developed emission inversion system (Jin et al., 2023), by assimilating NH<sub>3</sub> retrievals from the IASI instruments

onboard MetOp-A (operational from 2008 to 2018), MetOp-B (operational since 2012), and MetOp-C (operational since 2018) satellites. Instead of directly assimilating IASI measurements as previous studies have done, we incorporated the averaging kernel information from the latest version of the IASI product. This approach allowed us to update the column concentration observations before assimilation. By doing so, we ensure a fairer comparison between the simulated and observed columnar  $\text{NH}_3$  concentrations, a point that has been emphasized in several studies (Eskes and Boersma, 2003; von Clarmann and Glatthor, 2019), but never implemented in the IASI-based emission inversion.

**RC: 13) Clearly state the aims of this study, focusing on but not only the  $\text{NH}_3$  emission feature.**

**AR:** Many thanks for your feedback. We have revised the relevant section of the manuscript to clearly state the aims of this study. The specific revised excerpt is as follows:

***Text in manuscript :***

## **1 Introduction**

...

We aim to provide a more accurate estimation of  $\text{NH}_3$  emission inventories and to explore their spatial and temporal characteristics across South Asia. Additionally, it serves as a model for effectively calculating atmospheric pollution emissions in regions that have been less studied in the past. The study focuses on  $\text{NH}_3$  emissions but also contributes to a broader understanding of atmospheric pollution in under-researched regions.

**RC: 14) Which periods are used for MetOp A/B/C, respectively?**

**AR:** The latest v4 version of the IASI data, which includes averaging kernel information, has limited time coverage. Specifically, Metop-A covers the entire year of 2019, Metop-B covers from January to July 2019, and Metop-C has no data for 2019. As a result, we only used the available data from Metop-A and Metop-B within the 2019 time frame. I have made the corresponding changes in the manuscript to reflect this below:

***Text in manuscript :***

## **2.1 IASI satellite measurements**

...

The assimilated observations for estimating the  $\text{NH}_3$  emissions were the monthly IASI column

concentration means over the  $0.5^\circ \times 0.625^\circ$  GEOS-Chem grid cell. These values were derived from the latest ANNI-NH<sub>3</sub>-v4R-ERA5 product. Despite improvements in NH<sub>3</sub> column retrievals from satellite observations, there remains substantial variability in measurement uncertainty, ranging from 5 % to over 1000 %. (Van Damme et al., 2014; Whitburn et al., 2016; Van Damme et al., 2017). Data selection was performed by excluding nighttime observations, irrational values ( $< 0.1$  (Van Damme et al., 2018) and skin temperature  $> 263$  K (Van Damme et al., 2014) during the calculation of the monthly mean. It is important to note that the time coverage of the available version 4 IASI product used was limited: Metop-A provided data for the entire year of 2019, Metop-B provided data from January to July 2019, and Metop-C did not have data for 2019. Therefore, only the data from Metop-A and Metop-B within the 2019 time frame were used in this study.

**RC:15) If you are using the L2 data, how do you aggregate it into the GEOS-Chem grid?**

**AR:** The data is processed by reading daily NH<sub>3</sub> values and adding them to the corresponding GEOS-Chem grid cells. For each valid data point, if its latitude and longitude fall within the specified range, its NH<sub>3</sub> value is added to the appropriate grid cell.

**RC: 16) Except for the irrational values, have you detected any large outliers?**

**AR:** Thanks for your comment. We have not detected any significant outliers, aside from the irrational values that were excluded during the data selection process.

**RC: 17) It is unclear how the  $B$ ,  $A_z^a$ , and  $m_z$  coming from in the Eq. 1.**

**AR:** Thanks for your comment. To clarify, in Eq. 1:

$$m_z = \frac{M_z^m - B_z}{M^m - B}$$

$M_z^m$  represents the modeled concentration of NH<sub>3</sub> at altitude  $z$ .

$B_z$  is the background concentration of NH<sub>3</sub> at the same altitude.

$M^m$  represents the total modeled concentration of NH<sub>3</sub> in the atmosphere.

$B$  is the total background concentration.

$$A_z^a = \frac{1}{N} \frac{\hat{X}^a - B}{\hat{X}^l - B}$$

$\hat{X}^l$  represents the a priori (or assumed) concentration of NH<sub>3</sub> at altitude  $z$ .

$B_z$  is again the background concentration at that altitude.

$\hat{X}^a$  is the total a priori concentration.

N is a normalization factor, ensuring the matrix  $A_z^a$  sums correctly to account for all altitudes.

The specific revised description of the relevant part is as follows:

***Text in manuscript :***

**2.1 IASI satellite measurements**

...

Here,  $\hat{X}^m$  represents the IASI column concentration retrieved with model profile.  $\hat{X}^a$  denotes the initial IASI column concentration, with the background concentration B. The  $A_z$  values are AVK for each vertical layer, with the model profile  $m_z$ . More detailed information and the corresponding equations are provided in the supplementary materials equation S8 and S9.

***Supplement***

...

$$m_z = \frac{M_z^m - B_z}{M^m - B}$$

here  $M_z^m$  represents the modeled concentration of  $\text{NH}_3$  at altitude z.  $B_z$  is the background concentration of  $\text{NH}_3$  at the same altitude.  $M^m$  represents the total modeled concentration of  $\text{NH}_3$  in the atmosphere. B is the total background concentration.

$$A_z^a = \frac{1}{N} \frac{\hat{X}^a - B}{\hat{X}^{lz} - B_z}$$

here  $\hat{X}^{lz}$  represents the a priori (or assumed) concentration of  $\text{NH}_3$  at altitude z.  $B_z$  is again the background concentration at that altitude.  $\hat{X}^a$  is the total a priori concentration. N is a normalization factor, ensuring the matrix  $A_z^a$  sums correctly to account for all altitudes.

**RC: 18) I do not see the 'a' in Eq.3, where has it been used?**

**AR:** Appreciate your comment.  $\alpha$  is a spatially varying tuning factor. It is used to compensate for the uncertainty in ammonia emissions and to adjust the spatial variability in the emission estimates.  $\alpha$  influences the calculation of the background error covariance matrix **B** through its spatial variation, helping to optimize the ammonia emission estimates.

**RC: 19) How is the parameter ' $\sigma_{\text{integrated}}$ ' calculated in Eq. 6?**

**AR:** Thanks for comment.  $\sigma_{\text{integrated}}$  is the same as  $\sigma_{\text{total}}$  in Equation 2. I have modified and unified the parameter names in both equations.

**Text in manuscript :**

### **2.1 IASI satellite measurements**

...

$$\sigma^{\text{integrated}} = \left\{ (\sigma^{\text{instrument}})^2 + (\sigma^{\text{representing}})^2 \right\}^{0.5} \quad (2)$$

### **2.3 Emission inversion system**

...

$$O_{i,i} = \min \left( 1.0 \times 10^{16} \text{ molec cm}^{-2}, \sigma^{\text{integrated}} \right)^2 \quad (6)$$

**RC: 20) Add more information such as the boundary layer condition, the spin-up process, model version...**

**AR:** Many thanks for your feedback. I have added more detailed information, including the boundary layer condition, the spin-up process, and the model version. The manuscript fragment with more information about the model is as follows:

**Text in manuscript :**

GEOS-Chem, a three-dimensional (3-D) global tropospheric chemistry model, is driven by assimilated meteorological data obtained from the Goddard Earth Observing System (GEOS) at the NASA Data Assimilation Office (DAO) (Bey et al., 2001). GEOS-Chem incorporates a fully integrated chemistry system involving aerosol, ozone, NO<sub>x</sub>, and hydrocarbons, as described by Park et al. (2004). The wet deposition scheme is explained by Liu et al. (2001) for water-soluble aerosols and by Amos et al. (2012) for gaseous components. Dry deposition is modeled using the resistance-in-series scheme proposed by Wesely and Lesht (1989), as applied by Wang and Jacob (1998). Size-specific aerosol dry deposition follows the approach outlined by Emerson et al. (2020). A nested grid simulation within the GEOS-Chem model v13.4.1 is conducted to simulate the atmospheric environment over South Asia. The nested domain (60°–98°E, 4°–40°N), shown in Fig. 2, has a horizontal resolution of 0.5° latitude by 0.625° longitude, accompanied by 47 vertical layers. The model is driven by meteorological fields from the Modern-Era Retrospective analysis for Research and Applications, Version 2 (MERRA-2) reanalysis dataset provided by the Global Modeling and Assimilation Office (GMAO) at NASA. The model employs a three-months spin-up period to minimize the influence of initial conditions. Lateral boundary conditions for the nested domain are updated every 3 hours using output from the global GEOS-Chem simulation at 2° × 2.5° resolution. Chemical initial conditions are also obtained from the global simulation to ensure consistency.

**RC: 21) Sect. 2.3.1 and 2.3.2 can be combined.**

**AR:** Thank you for your kind comment. I have merged Sections 2.3.1 and 2.3.2 into a single section: **GEOS-Chem model and emission inventory**

***RC: 22) Do you run the model for the whole year 2019?***

**AR:** Yes, we ran the model for the entire year of 2019.

***RC: 23) The step that coarse-grained CEDS into  $0.5 \times 0.625$  degs included in the GEOS-Chem or seperately?***

**AR:** Thanks for comment. The step of coarse-graining the CEDS data into  $0.5^\circ \times 0.625^\circ$  is done separately and is not included in the GEOS-Chem model. We directly made modifications to the original emission inventory.

***RC: 24) What is the spatial resolution of the CEDS and is there any regional emission inventory with higher resolution over South Asia that you can use? Does CEDS contain both the anthropogenic and natural sectors?***

**AR:** The spatial resolution of the CEDS emission inventory is  $0.5^\circ \times 0.5^\circ$ , and it only covers anthropogenic emission data. For the South Asia region, there are higher resolution emission inventories available. For example, MIXv2 is a long-term emission inventory for Asia with a spatial resolution of  $0.1^\circ$ , covering emission data for Southeast and South Asia.

It is important to note, however, that while higher spatial resolution in emission inventories may seem advantageous, it does not necessarily result in better inversion outcomes, as there is no direct correlation between higher resolution and improved inversion accuracy.

***RC: 25) Figure 1: Increase the size of the dots and change the color regime. I suggest using different point styles for different measurements.***

**AR:** Appreciate your comment. I have increased the size of the dots and adjusted the color regime as requested. Additionally, I have used different point styles to differentiate the various measurements in Figure 1. Considering the sequence of figures mentioned in the original text, we have also changed Figure 1 to Figure 2. The specific revised content is as follows:

***Text in manuscript :***

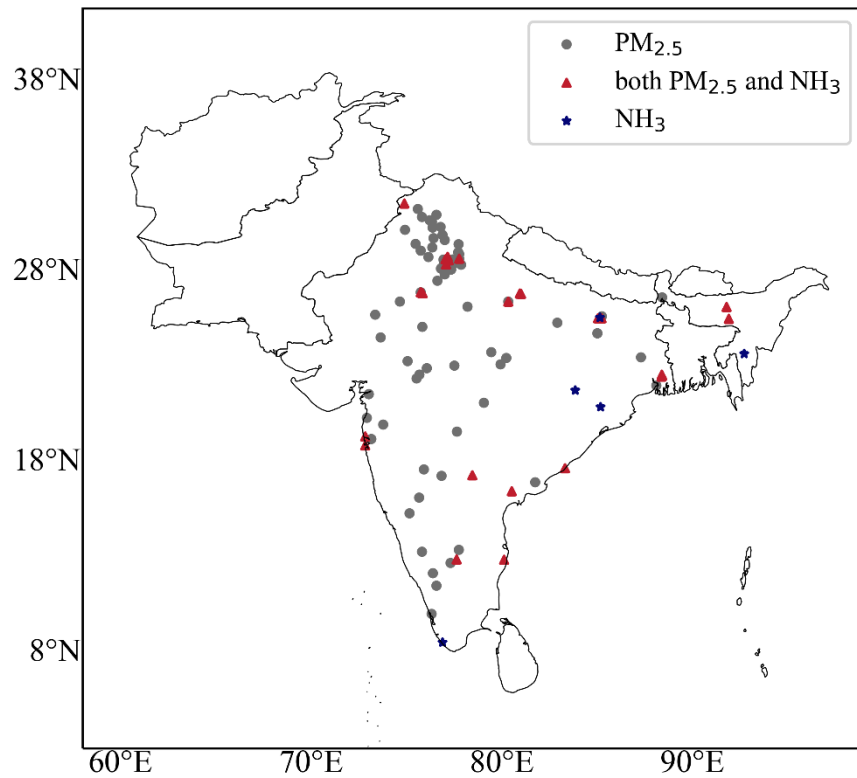

Figure 2. The GEOS-Chem model simulation domain, with dots indicating the locations of ground observation stations from the Central Pollution Control Board (CPCB), India. The three different colored dots represent stations with only  $\text{PM}_{2.5}$  observations, stations with both  $\text{PM}_{2.5}$  and  $\text{NH}_3$  observations, and stations with only  $\text{NH}_3$  observations, respectively.

**RC: 26) Figure 1: Can you list these stations in the supplementary?**

**AR:** Appreciate your comment. I have added the list of stations in the supplementary material as requested.

**Table in supplement :**

| Station | lon         | lat         | StationName                                  | City          | State          |
|---------|-------------|-------------|----------------------------------------------|---------------|----------------|
| AP001   | 80.5181667  | 16.5150833  | Secretariat, Amaravati - APPCB               | Amaravati     | Andhra Pradesh |
| AP005   | 83.3        | 17.72       | GVM Corporation, Visakhapatnam - APPCB       | Visakhapatnam | Andhra Pradesh |
| DL001   | 77.152491   | 28.815691   | Alipur, Delhi - DPCC                         | Delhi         | Delhi          |
| DL002   | 77.749675   | 28.725645   | Anand Vihar, Delhi - DPCC                    | Delhi         | Delhi          |
| DL019   | 77.2005     | 28.6341     | Mandir Marg, Delhi - DPCC                    | Delhi         | Delhi          |
| DL020   | 77.030469   | 28.68241    | Mundka, Delhi - DPCC                         | Delhi         | Delhi          |
| DL024   | 80.3229863  | 26.4703136  | Nehru Nagar, Delhi - DPCC                    | Delhi         | Delhi          |
| HR012   | 77.0667     | 28.4227     | Sector-51, Gurugram - HSPCB                  | Gurugram      | Haryana        |
| KA011   | 77.622813   | 12.917348   | Silk Board, Bengaluru - KSPCB                | Bengaluru     | Karnataka      |
| MH008   | 72.82       | 18.91       | Gole Bazar, Katni - MPCCB                    | Katni         | Madhya Pradesh |
| PB001   | 74.876512   | 31.62       | Golden Temple, Amritsar - PPCB               | Amritsar      | Punjab         |
| RJ004   | 75.836858   | 26.902909   | Adarsh Nagar, Jaipur - RSPCB                 | Jaipur        | Rajasthan      |
| RJ005   | 75.7994901  | 26.9164092  | Police Commissionerate, Jaipur - RSPCB       | Jaipur        | Rajasthan      |
| RJ006   | 75.730943   | 26.9502929  | Shastri Nagar, Jaipur - RSPCB                | Jaipur        | Rajasthan      |
| TN001   | 80.1076538  | 12.9099161  | Alandur Bus Depot, Chennai - CPCB            | Chennai       | Tamil Nadu     |
| TC006   | 78.451437   | 17.349694   | Zoo Park, Hyderabad - TSPCB                  | Hyderabad     | Telangana      |
| UP012   | 80.9302753  | 26.8821003  | Central School, Lucknow - CPCB               | Lucknow       | Uttar Pradesh  |
| UP013   | 81.005119   | 26.86812    | Gomti Nagar, Lucknow - UPPCB                 | Lucknow       | Uttar Pradesh  |
| WB007   | 88.3638022  | 22.5367507  | Ballygunge, Kolkata - WBPCB                  | Kolkata       | West Bengal    |
| WB008   | 88.41002457 | 22.58157048 | Bidhannagar, Kolkata - WBPCB                 | Kolkata       | West Bengal    |
| AS001   | 91.78063    | 26.181742   | Railway Colony, Guwahati - APCB              | Guwahati      | Assam          |
| MH012   | 72.8204     | 19.3832     | Vasai West, Mumbai - MPCB                    | Mumbai        | Maharashtra    |
| WB011   | 88.380669   | 22.627847   | Rabindra Bharati University, Kolkata - WBPCB | Kolkata       | West Bengal    |
| ML001   | 91.8985     | 25.5586     | Lumpyngngad, Shillong - Meghalaya PCB        | Shillong      | Meghalaya      |
| BR005   | 85.043586   | 25.586562   | DRM Office Danapur, Patna - BSPCB            | Patna         | Bihar          |
| BR006   | 85.227158   | 25.592539   | Govt. High School Shikarpur, Patna - BSPCB   | Patna         | Bihar          |

Table S1. Stations with both PM<sub>2.5</sub> data and NH<sub>3</sub> data

| Station | lon        | lat         | StationName                                     | City              | State          |
|---------|------------|-------------|-------------------------------------------------|-------------------|----------------|
| AP002   | 81.7363176 | 16.9872867  | Anand Kala Kshetram, Rajamahendravaram - APPCB  | Rajamahendravaram | Andhra Pradesh |
| BR001   | 84.9994    | 24.7955     | Collectorate, Gaya - BSPCB                      | Gaya              | Bihar          |
| BR003   | 85.2459    | 25.697189   | Industrial Area, Hajipur - BSPCB                | Hajipur           | Bihar          |
| HR001   | 76.778328  | 30.379589   | Patti Mehar, Ambala - HSPCB                     | Ambala            | Haryana        |
| HR002   | 76.9254    | 28.6701     | Arya Nagar, Bahadurgarh - HSPCB                 | Bahadurgarh       | Haryana        |
| HR003   | 77.196999  | 28.3419248  | Nathu Colony, Ballabgarh - HSPCB                | Ballabgarh        | Haryana        |
| HR004   | 76.141105  | 28.806223   | ILB. Colony, Bhiwani - HSPCB                    | Bhiwani           | Haryana        |
| HR005   | 76.7997    | 28.2068     | Municipal Corporation Office, Dharuhera - HSPCB | Dharuhera         | Haryana        |
| HR010   | 75.467934  | 29.503664   | Huda Sector, Fatehabad - HSPCB                  | Fatehabad         | Haryana        |
| HR015   | 75.744941  | 29.14056    | Urban Estate-II, Hisar - HSPCB                  | Hisar             | Haryana        |
| HR016   | 76.337619  | 29.307814   | Police Lines, Jind - HSPCB                      | Jind              | Haryana        |
| HR017   | 76.4155    | 29.8006     | Rishi Nagar, Kaithal - HSPCB                    | Kaithal           | Haryana        |
| HR018   | 77.0027    | 29.6953     | Sector-12, Karnal - HSPCB                       | Karnal            | Haryana        |
| HR019   | 76.875879  | 29.966942   | Sector-7, Kurukshetra - HSPCB                   | Kurukshetra       | Haryana        |
| HR020   | 76.9938    | 27.9002     | General Hospital, Mandikhera - HSPCB            | Mandikhera        | Haryana        |
| HR021   | 76.93609   | 28.360699   | Sector-2 IMT, Manesar - HSPCB                   | Manesar           | Haryana        |
| HR022   | 75.730943  | 26.9502929  | Shastri Nagar, Narnaul - HSPCB                  | Narnaul           | Haryana        |
| KA001   | 75.699694  | 16.172806   | Vidayagiri, Bagalkot - KSPCB                    | Bagalkot          | Karnataka      |
| KA012   | 76.55521   | 11.55358    | Urban, Chamarajanagar - KSPCB                   | Chamarajanagar    | Karnataka      |
| KA013   | 77.731418  | 13.428828   | Chikkaballapur Rural, Chikkaballapur - KSPCB    | Chikkaballapur    | Karnataka      |
| KA014   | 75.797056  | 13.328028   | Kalyana Nagara, Chikkamagaluru - KSPCB          | Chikkamagaluru    | Karnataka      |
| KL001   | 76.302765  | 10.073232   | Udyogamandal, Floor - Kerala PCB                | Floor             | Kerala         |
| MP002   | 79.446246  | 23.81748678 | Shrivastav Colony, Damoh - MPCCB                | Damoh             | Madhya Pradesh |
| MP003   | 76.064118  | 22.9682591  | Bhopal Chauraha, Dewas - MPCCB                  | Dewas             | Madhya Pradesh |
| MP004   | 78.193251  | 26.203442   | City Center, Gwalior - MPCCB                    | Gwalior           | Madhya Pradesh |
| MP006   | 75.5213    | 22.431      | Chhoti Gwaltoli, Indore - MPCCB                 | Indore            | Madhya Pradesh |
| MP007   | 79.932247  | 23.168606   | Marhatal, Jabalpur - MPCCB                      | Jabalpur          | Madhya Pradesh |
| MP008   | 80.23284   | 23.50016    | Gole Bazar, Katni - MPCCB                       | Katni             | Madhya Pradesh |
| MH002   | 77.6345232 | 19.645324   | Chandrapur, Chandrapur - MPCB                   | Chandrapur        | Maharashtra    |
| MH004   | 73.142019  | 19.25292    | Khadakpada, Kalyan - MPCB                       | Kalyan            | Maharashtra    |
| PB002   | 74.907758  | 30.233011   | Hardev Nagar, Bathinda - PPCB                   | Bathinda          | Punjab         |
| PB003   | 75.578914  | 31.321907   | Civil Line, Jalandhar - PPCB                    | Jalandhar         | Punjab         |
| PB004   | 76.209694  | 30.736056   | Kalal Majra, Khanna - PPCB                      | Khanna            | Punjab         |
| PB005   | 75.8086    | 30.9028     | Punjab Agricultural University, Ludhiana - PPCB | Ludhiana          | Punjab         |
| PB006   | 76.331442  | 30.649961   | RIMT University, Mandi Gobindgarh - PPCB        | Gobindgarh        | Punjab         |
| PB007   | 76.366642  | 30.349388   | Model Town, Patiala - PPCB                      | Patiala           | Punjab         |
| PB008   | 76.5623046 | 31.0325454  | Ratanpura, Rupnagar - Ambuja Cements            | Rupnagar          | Punjab         |
| RJ001   | 76.611536  | 27.554793   | Moti Doongri, Alwar - RSPCB                     | Alwar             | Rajasthan      |
| RJ002   | 74.646594  | 26.470859   | Civil Lines, Ajmer - RSPCB                      | Ajmer             | Rajasthan      |
| RJ003   | 76.862296  | 28.194909   | RIICO Ind. Area III, Bhiwadi - RSPCB            | Bhiwadi           | Rajasthan      |
| RJ007   | 84.9994    | 24.7955     | Collectorate, Jodhpur - RSPCB                   | Jodhpur           | Rajasthan      |
| RJ008   | 75.821256  | 25.14389    | Shrinath Puram, Kota - RSPCB                    | Kota              | Rajasthan      |
| RJ009   | 73.340227  | 25.771061   | Indira Colony Vistar, Pali - RSPCB              | Pali              | Rajasthan      |
| RJ010   | 73.6321397 | 24.5886166  | Ashok Nagar, Udaipur - RSPCB                    | Udaipur           | Rajasthan      |
| UP003   | 77.849831  | 28.406963   | Yamunapuram, Bulandshahr - UPPCB                | Bulandshahr       | Uttar Pradesh  |
| UP006   | 77.453839  | 28.685382   | Sanjay Nagar, Ghaziabad - UPPCB                 | Ghaziabad         | Uttar Pradesh  |
| UP008   | 77.482     | 28.47272    | Knowledge Park - III, Greater Noida - UPPCB     | Greater Noida     | Uttar Pradesh  |
| UP010   | 77.749675  | 28.725645   | Anand Vihar, Hapur - UPPCB                      | Hapur             | Uttar Pradesh  |
| UP011   | 80.3229863 | 26.4703136  | Nehru Nagar, Kanpur - UPPCB                     | Kanpur            | Uttar Pradesh  |
| WB002   | 87.2892225 | 23.5404352  | Sidhu Kanhu Indoor Stadium, Durgapur - WBPCB    | Durgapur          | West Bengal    |
| WB003   | 88.109737  | 22.06047    | Haldia, Haldia - WBPCB                          | Haldia            | West Bengal    |
| GJ002   | 73.010555  | 21.613267   | GIDC, Ankleshwar - GPCB                         | Ankleshwar        | Gujarat        |
| GJ004   | 73.010555  | 21.613267   | GIDC, Nandesari - Nandesari Ind. Association    | Nandesari         | Gujarat        |
| GJ005   | 72.918013  | 20.362421   | Phase-I GIDC, Vapi - GPCB                       | Vapi              | Gujarat        |
| HR023   | 77.3320667 | 28.1485564  | Shyam Nagar, Palwal - HSPCB                     | Palwal            | Haryana        |
| MH015   | 79.0517531 | 21.152875   | Opp GPO Civil Lines, Nagpur - MPCB              | Nagpur            | Maharashtra    |
| MH016   | 73.7762427 | 20.0073285  | Gangapur Road, Nashik - MPCB                    | Nashik            | Maharashtra    |
| MH021   | 75.9063906 | 17.6599188  | Solapur, Solapur - MPCB                         | Solapur           | Maharashtra    |
| UP018   | 77.7622941 | 28.9535882  | Jai Bhim Nagar, Meerut - UPPCB                  | Meerut            | Uttar Pradesh  |
| UP019   | 77.709723  | 29.06351    | Pallavpuram Phase 2, Meerut - UPPCB             | Meerut            | Uttar Pradesh  |
| UP021   | 77.7194031 | 29.4723508  | New Mandi, Muzaffarnagar - UPPCB                | Muzaffarnagar     | Uttar Pradesh  |
| UP022   | 77.3231257 | 28.5447608  | Sector - 125, Noida - UPPCB                     | Noida             | Uttar Pradesh  |
| KA015   | 75.140726  | 15.351773   | Deshpande Nagar, Hubballi - KSPCB               | Hubballi          | Karnataka      |
| WB014   | 88.412668  | 26.6883049  | Ward-32 Bapupara, Siliguri - WBPCB              | Siliguri          | West Bengal    |
| KA017   | 76.37376   | 12.21041    | Hebbal 1st Stage, Mysuru - KSPCB                | Mysuru            | Karnataka      |
| KA018   | 77.298051  | 12.733409   | Vijay Nagar, Ramanagara - KSPCB                 | Ramanagara        | Karnataka      |
| MP010   | 77.511428  | 23.10844    | Sector-D Industrial Area, Mandideep - MPCCB     | Mandideep         | Madhya Pradesh |
| MP011   | 75.675238  | 22.624758   | Sector-2 Industrial Area, Pithampur - MPCCB     | Pithampur         | Madhya Pradesh |
| MP012   | 75.045981  | 23.331731   | Shastri Nagar, Ratlam - IPCA Lab                | Ratlam            | Madhya Pradesh |
| UP025   | 77.393848  | 28.56923    | Sector-116, Noida - UPPCB                       | Noida             | Uttar Pradesh  |
| UP026   | 82.9083074 | 25.3505986  | Ardhali Bazar, Varanasi - UPPCB                 | Varanasi          | Uttar Pradesh  |
| KA016   | 76.822628  | 17.321993   | Lal Bahadur Shastri Nagar, Kalaburagi - KSPCB   | Kalaburagi        | Karnataka      |

Table S2. Stations with PM<sub>2.5</sub> data but without NH<sub>3</sub> data



| Station | lon        | lat        | StationName                                  | City               | State   |
|---------|------------|------------|----------------------------------------------|--------------------|---------|
| BR008   | 85.147382  | 25.619651  | Muradpur, Patna - BSPCB                      | Patna              | Bihar   |
| KL007   | 76.8865    | 8.5637     | Kariavattom, Thiruvananthapuram - Kerala PCB | Thiruvananthapuram | Kerala  |
| MZ001   | 92.7192841 | 23.7176342 | Sikulpuikawn, Aizawl - Mizoram PCB           | Aizawl             | Mizoram |
| OD001   | 83.8396977 | 21.8004996 | GM Office, Brajrajnagar - OSPCB              | Brajrajnagar       | Odisha  |
| OD002   | 85.1707021 | 20.9360711 | Talcher Coalfields, Talcher - OSPCB          | Talcher            | Odisha  |

Table S3. Stations with NH<sub>3</sub> data but without PM<sub>2.5</sub> data

**RC: 27) Figure 2: Row (b) seems useless and not mentioned in the text, consider moving to the supplementary.**

**AR:** Thanks for comment. I have moved row (b) of Figure 2 to the supplementary material, as it is not discussed in the main text.

**Figure in supplement:**

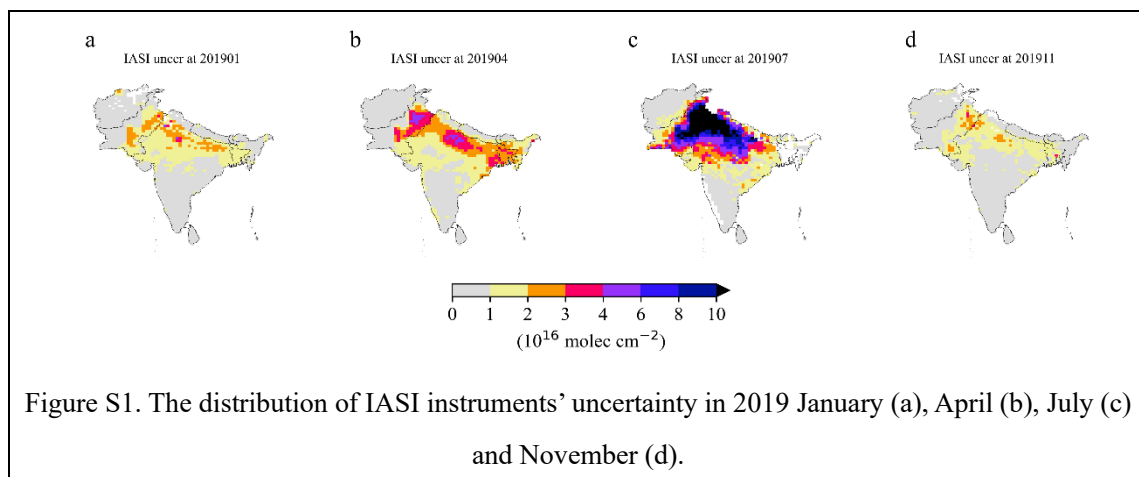

**RC: 28) Figure 2: The way you plotted the IASI and GC seems different.**

**AR:** Many thanks for your feedback. Yes, we use scatter plots for the IASI data, while the model simulations are presented using filled contour maps to show their respective spatial distributions.

**Figure in manuscript:**

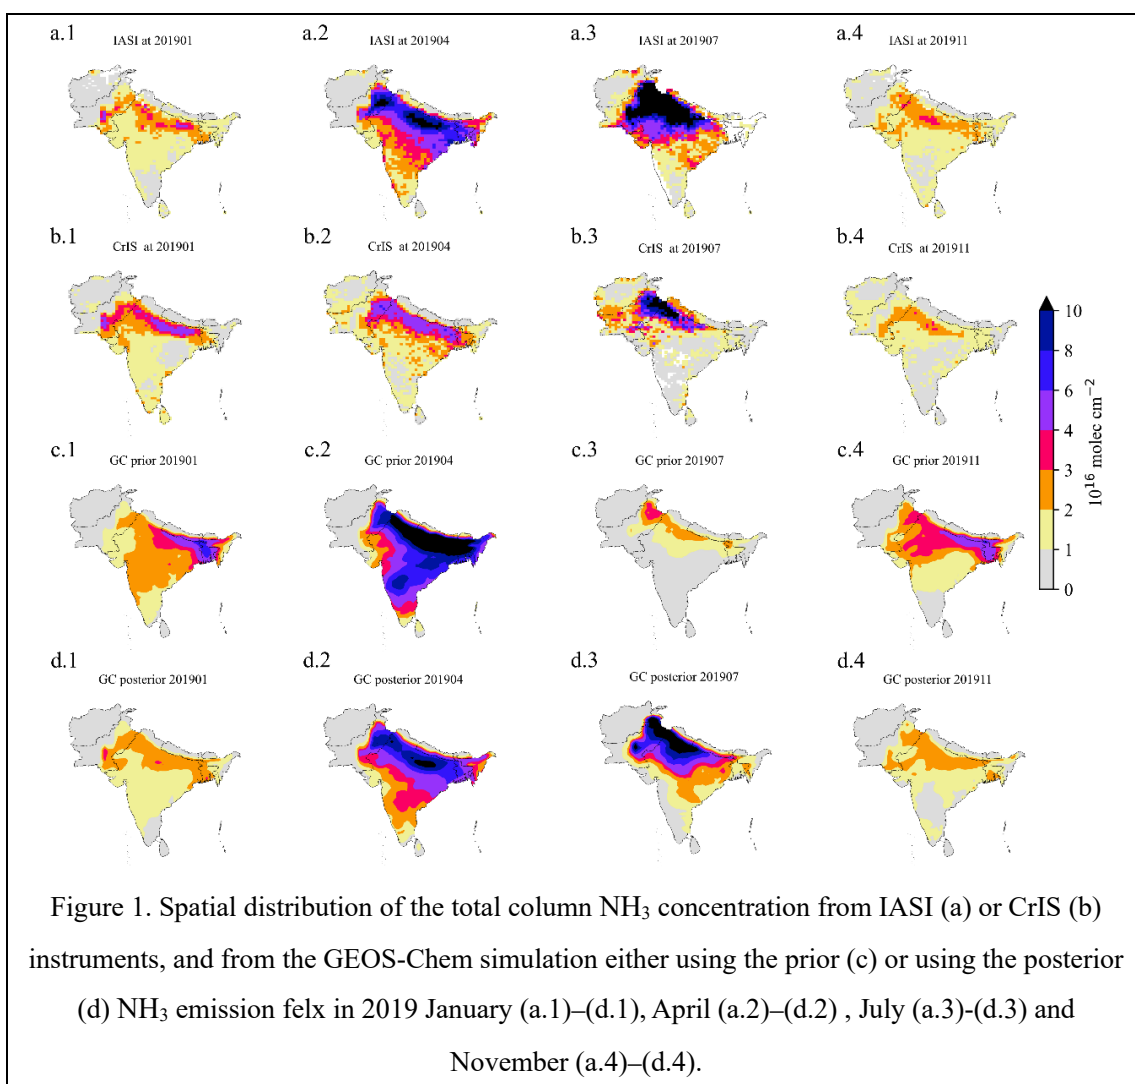

**RC: 29) Figure 3: I am curious why there are 0 values (grey area) in the CEDS prior and posterior, and how you deal with this 0 values or missing gap in the posterior. It may look confused since there are lots of grey area in (a) and (b) but not shown in (c)**

**AR:** Thanks for comment. Apologies for the confusion. The values in the grey area are not zero, but rather fall within the range of 0 to 0.2. They are indeed non-zero, but the values are quite small. We have treated these small values as valid and have not excluded them in the posterior, which may explain why they appear differently in panel (c).

**Text in manuscript:**

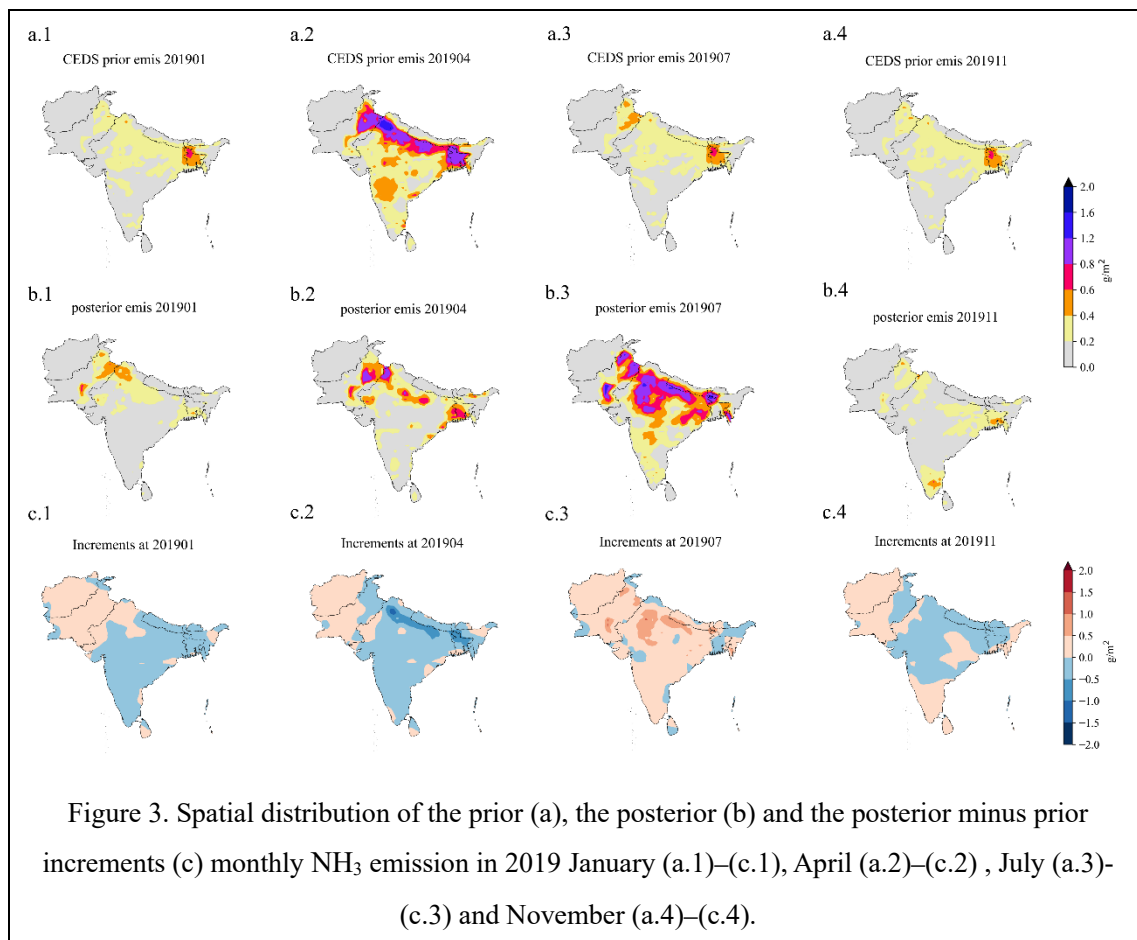

**RC: 30)  $\text{NH}_3$  total column concentration: "Four months": in 2019. Note all month are presented in Fig.4.**

**AR:** Apologies for the confusion, we have revised this statement in the original text. The specific revised fragment is as follows:

**Text in manuscript:**

### **3.1.1 Spatial $\text{NH}_3$ total column concentration**

The prior and posterior snapshot of  $\text{NH}_3$  column concentration simulations for four months (January, April, July, and November) are presented in Fig. 1 (c)-(d), alongside the IASI measurements shown in panel (a).

**RC: 31) "Distributions for the rest months": could you provide timeseries or seasonal pattern of these two satellite observations?**

**AR:** Thanks for comment. The time series for the two satellites are presented in panel (a) of Figure

4, while the spatial distribution is shown in Figure S3.

**Figure in manuscript and supplement :**

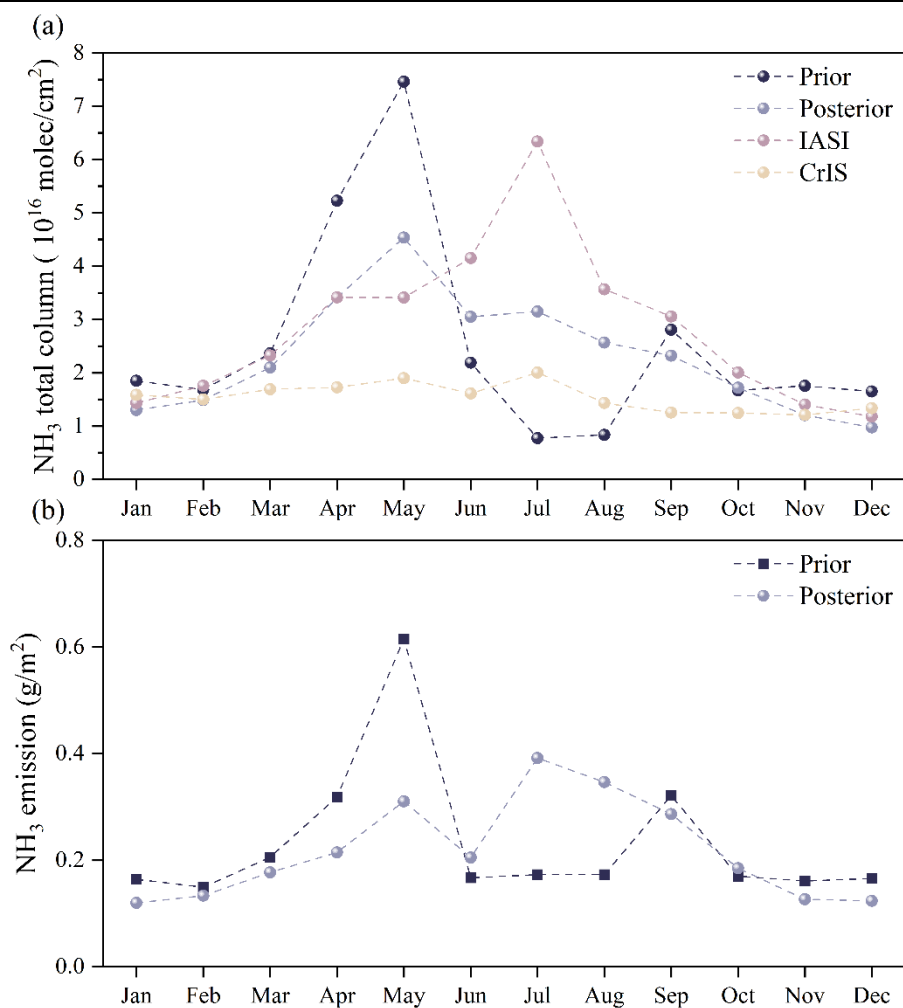

Figure 4. The monthly average total  $\text{NH}_3$  column concentrations from the prior and posterior IASI-observed, and CrIS-observed from January to December (a). The monthly average values of prior and posterior emissions from January to December (b).

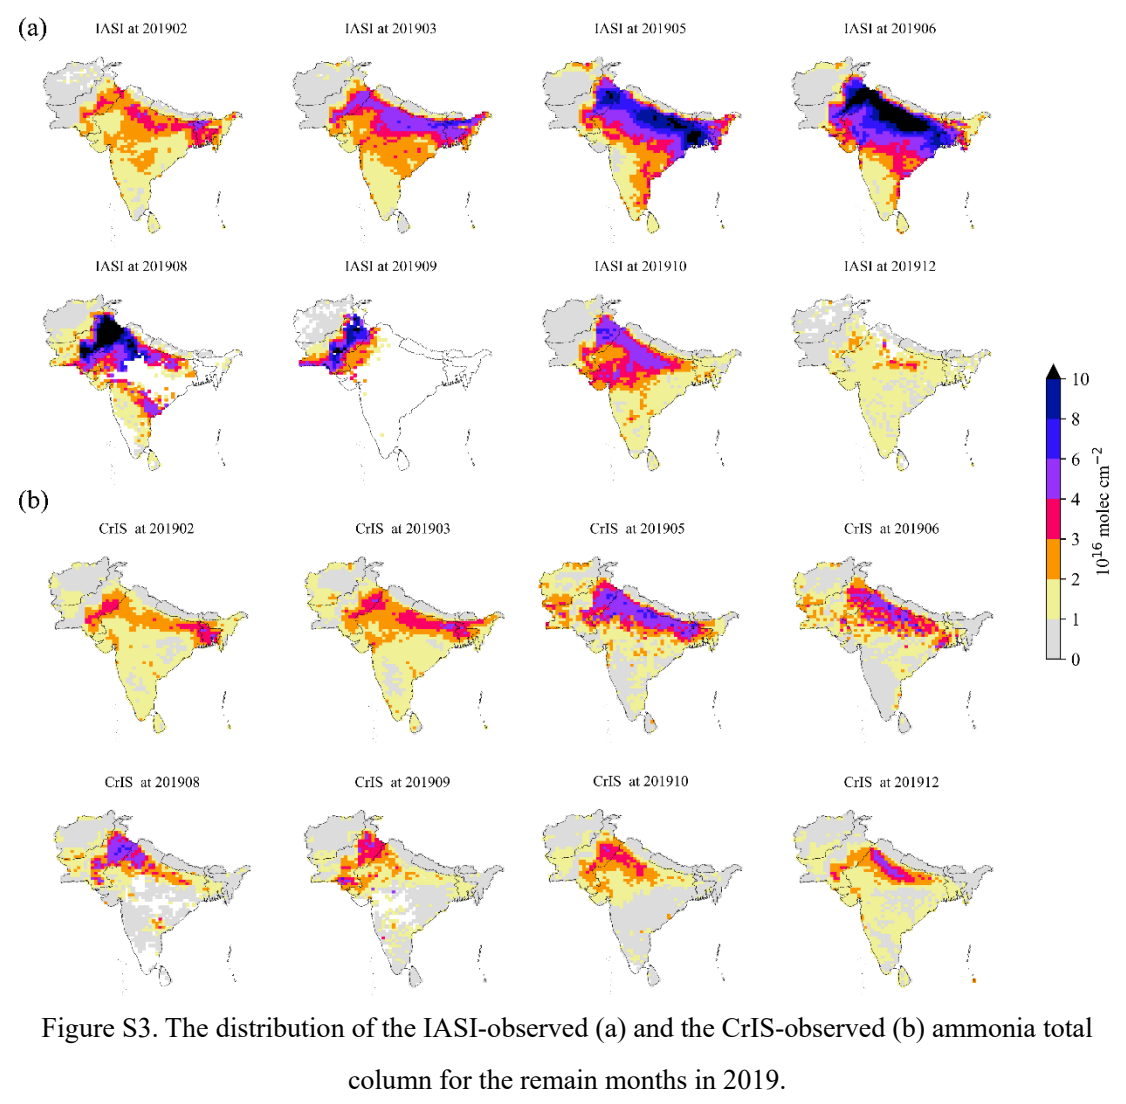

**RC: 32) "background error covariance matrix": does this refer to  $B$  in Eq.3 and 5?**

**AR:** Yes, the "background error covariance matrix" refers to  $B$  in Equations 3 and 5.

**Text in manuscript :**

### 2.3 Emission inversion system

...

$$\mathcal{J}(f) = \frac{1}{2} (f - f_b)^T B^{-1} (f - f_b) + \frac{1}{2} \{y - \mathcal{H}\mathcal{M}(f)\}^T O^{-1} \{y - \mathcal{H}\mathcal{M}(f)\} \quad (3)$$

$$B(i, j) = \sigma^2 \cdot f(i) \cdot f(j) \cdot C(i, j) \quad (5)$$

#### 3.1.1 Spatial $\text{NH}_3$ total column concentration

...

Note that there are still some discrepancies in the posterior simulation vs IASI column measurements. In particular, as shown in panel a.3 vs. d.3 of Fig. 1, the posterior simulation did not fully reproduce the extremely high  $\text{NH}_3$  loading observed by IASI in July (with column-integrated concentrations exceeding  $10 \times 10^{16} \text{ molec cm}^{-2}$ ). This occurs because the goal of the assimilation is to achieve the best fit between the posterior, the observations, and the prior emissions, rather than just fitting the observations alone. The extremely high  $\text{NH}_3$  concentrations are less likely given the relatively low prior  $\text{NH}_3$  emissions and the background error covariance matrix described in Section 2.3.

**RC: 33)  $\text{NH}_3$  and  $\text{PM}_{2.5}$  ground concentration validation: "The mismatch": specify which kind of mismatch, bias mismatch or spatial/temporal**

**AR:** Thanks for comment. The mismatch mentioned refers to both bias and spatial mismatches. The bias mismatch is observed in the differences between the ground observations and simulations, where ground  $\text{NH}_3$  concentrations were occasionally higher than the simulations. The spatial mismatch could be due to the locations of the monitoring stations, which are often in urban areas where  $\text{NH}_3$  levels are higher due to traffic and human activities.

**RC: 34) Can also add the Bias in Fig. 4, 5 and 7.**

**AR:** Many thanks for your feedback. I have added the bias to Figures 4, 5, and 7 as requested.

**RC: 35) Fig. 4 and 5 can be combined.**

**AR:** Thanks for comment. I have combined Figures 4 and 5 as per your recommendation. The revised figure along with RC (34) is as follows:

**Figure in manuscript:**

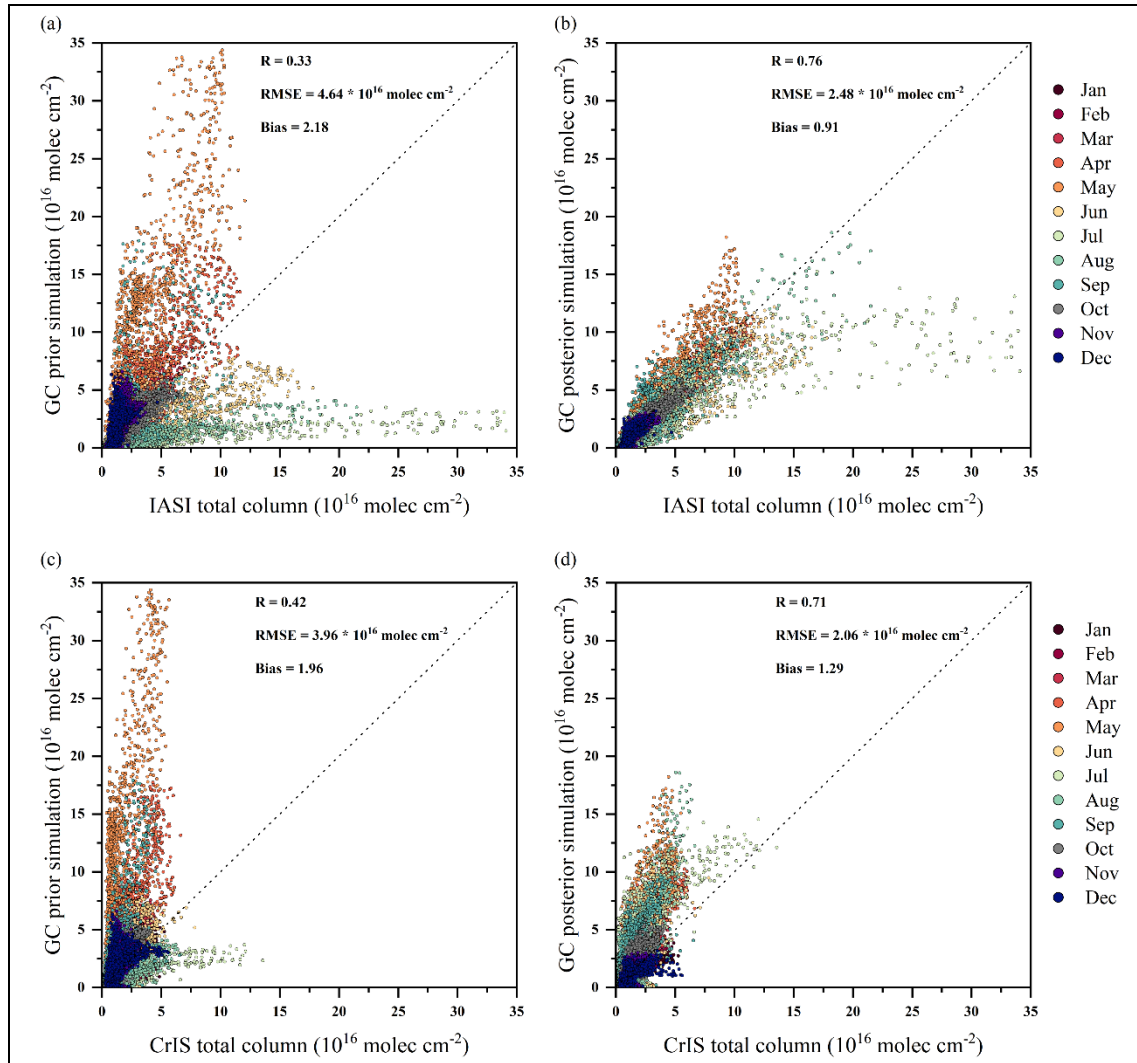

Figure 6. Scatter plot of the IASI (a-b) and CrIS (c-d) observed  $\text{NH}_3$  concentrations against the  $\text{NH}_3$  simulation over South Asia, either using the prior or the posterior  $\text{NH}_3$  emission inventory, from January to December.

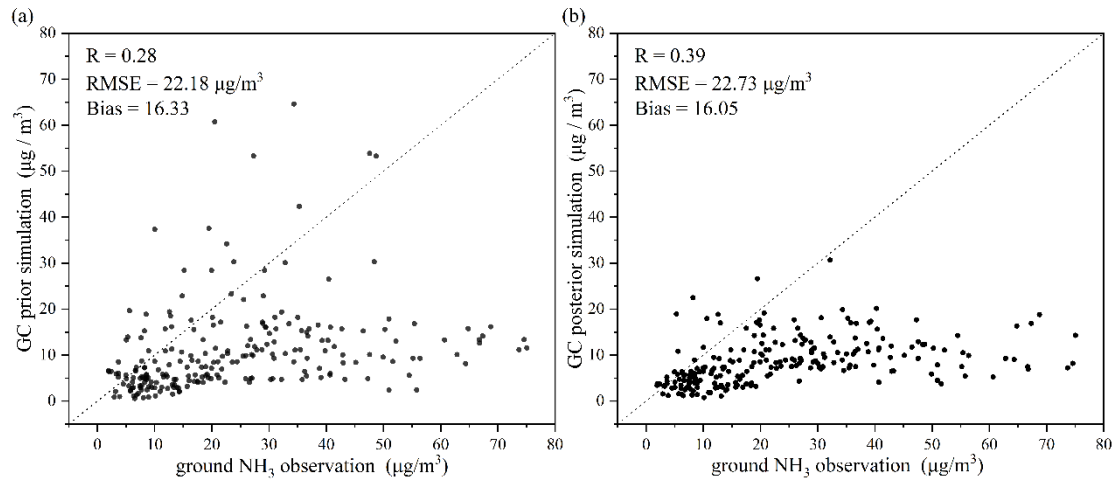

Figure 7. Scatter plot of the ground-observed against the  $\text{NH}_3$  simulation over South Asia either using the prior (a) or using the posterior (b)  $\text{NH}_3$  emission inventory in 2019.

**RC: 36) Fig. 2 and 6 can be combined.**

**AR:** Thanks for comment. I have combined Figures 2 and 6 as per your recommendation. The revised figure is as follows:

**Figure in manuscript:**

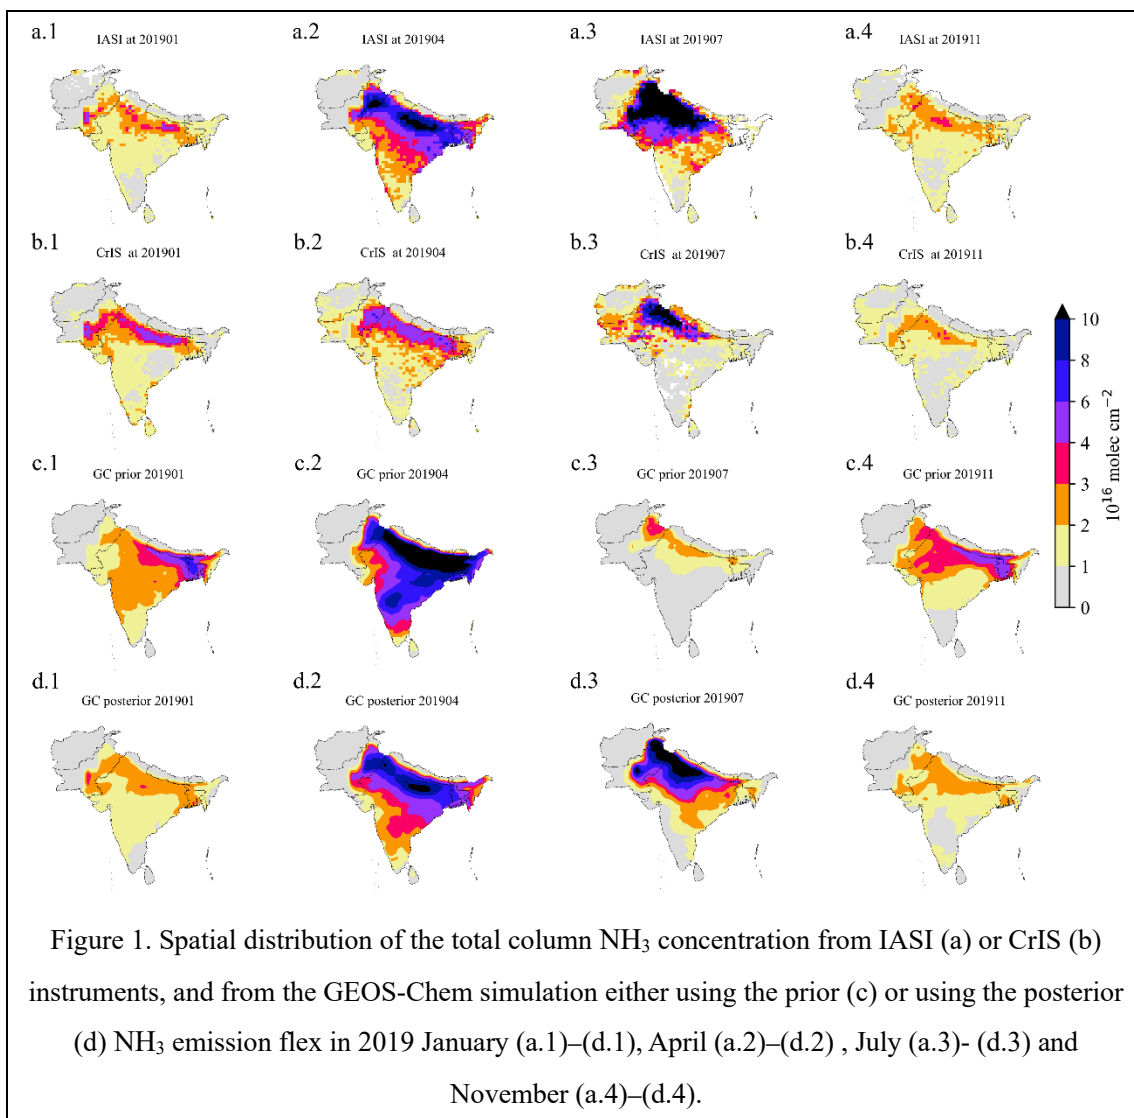

**RC: 37) "systematic biases": how do you define the systematic biases, which differentiate from the random error?**

**AR:** Thanks for comment. Systematic bias is a consistent and predictable deviation, usually caused by factors such as biases in input data (e.g., emission inventories). This type of error typically leads to the model consistently overestimating or underestimating the actual values in its predictions, whereas random errors are unpredictable and irregular, occurring due to factors that are not consistent across different measurements or observations.



**RC: 38) Seasonal and annual variation of ammonia concentration: The peaks in  $\text{NH}_3$  posterior concentration (May) and emission (July) are different and interesting, can you elaborate to explain it?**

**Reply:** Thank you for your kind comment. Although the posterior emission shows that July has the highest emissions, this emission is mainly due to human activities. Specifically, biomass combustion emissions are highest in spring, especially in May in Figure 4 (c), and anthropology emissions are also one of the peaks. Although anthropology emissions are highest in July, meteorological factors must also be considered. As shown in the Figure 4 (a) and (b), precipitation and temperature in July are the highest of the year. High temperatures increase ammonia volatilization, and the high precipitation increases the wet deposition of ammonia. These combined factors lead to July having a smaller concentration peak compared to May, despite being another peak month. The revised related discussion in the text is as follows:

**Text in manuscript :**

### 3.1.2 Seasonal and annual variation of $\text{NH}_3$ concentration

...

The high value in May is attributed to huge amount of biomass burning in South Asia during the spring in Figure S4 (c). We have identified the planting and harvesting times of crops in the South Asia region from USDA(U.S.DEPARTMENT OF AGRICULTURE, [https://ipad.fas.usda.gov/rssiws/al/crop\\_calendar/sasia.aspx](https://ipad.fas.usda.gov/rssiws/al/crop_calendar/sasia.aspx)). The heavy use of fertilizers in agricultural activities has resulted in the highest emission throughout the year, as will be illustrated in Fig. 4 (b) in Section 3.2. This has lead to the second  $\text{NH}_3$  concentration peak in July. The reasons for higher emissions in July but lower concentration levels compared to May could be attributed to meteorological factors. The monsoon season in South Asia results in increased wet deposition, and notably, 2019 experienced the most intense monsoon since 1994 (NASA, 2020). As shown in the Figure S4 (a) and (b), precipitation and temperature in July are the highest of the year. High temperatures increase ammonia volatilization, and the high precipitation increases the wet deposition of ammonia. These combined factors lead to July having a smaller concentration peak compared to May, despite being another peak month.

...

### 3.2 Spatial and Seasonal variation of $\text{NH}_3$ emission

...

The substantial emissions in July, as indicated by the posterior inventory, can be attributed to the increased fertilizer application for rice and corn crops during the summer season (Tanvir et al., 2019). Although biomass burning emissions are generally higher in spring in Figure S4 (c), agricultural activities remain the primary contributors to  $\text{NH}_3$  emissions (Huang et al., 2016),

resulting in July surpassing May in emission intensity. From July to September, as rice and other crops progress through their growth stages, fertilizer application typically decreases, leading to a gradual reduction in  $\text{NH}_3$  emissions. Additionally, temperatures decline from August to September in Figure S4 (b), reducing the volatilization rate of  $\text{NH}_3$ . This pattern occurs because  $\text{NH}_3$  volatilization is strongly influenced by temperature (Fan et al., 2011)

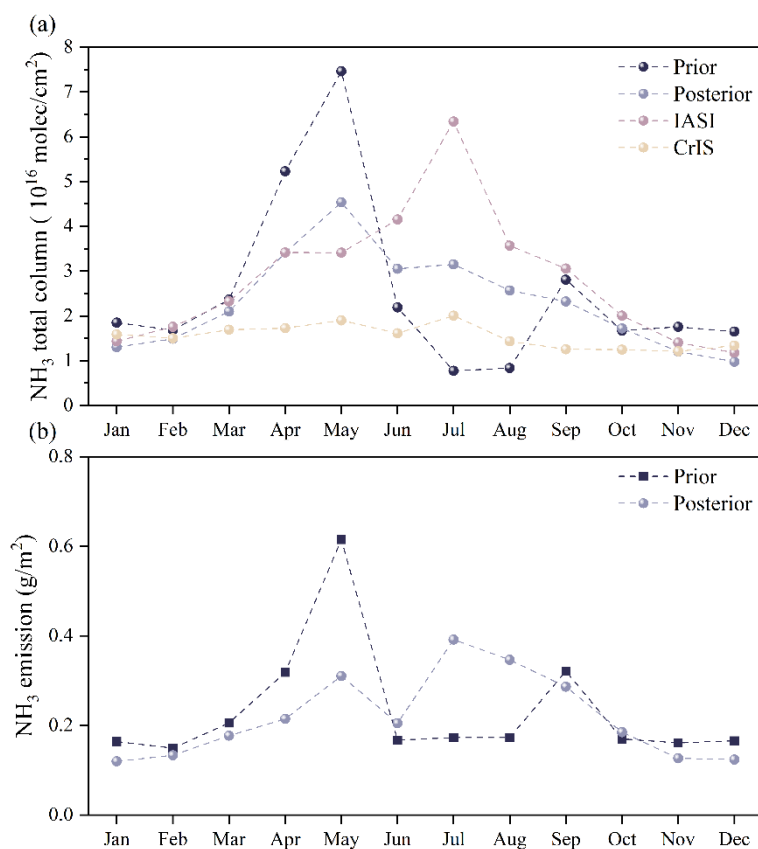

Figure 4. The monthly average total  $\text{NH}_3$  column concentrations from the prior and posterior, IASI-observed, and CrIS-observed from January to December (a). The monthly average values of prior and posterior emissions from January to December (b).

**Supplement**

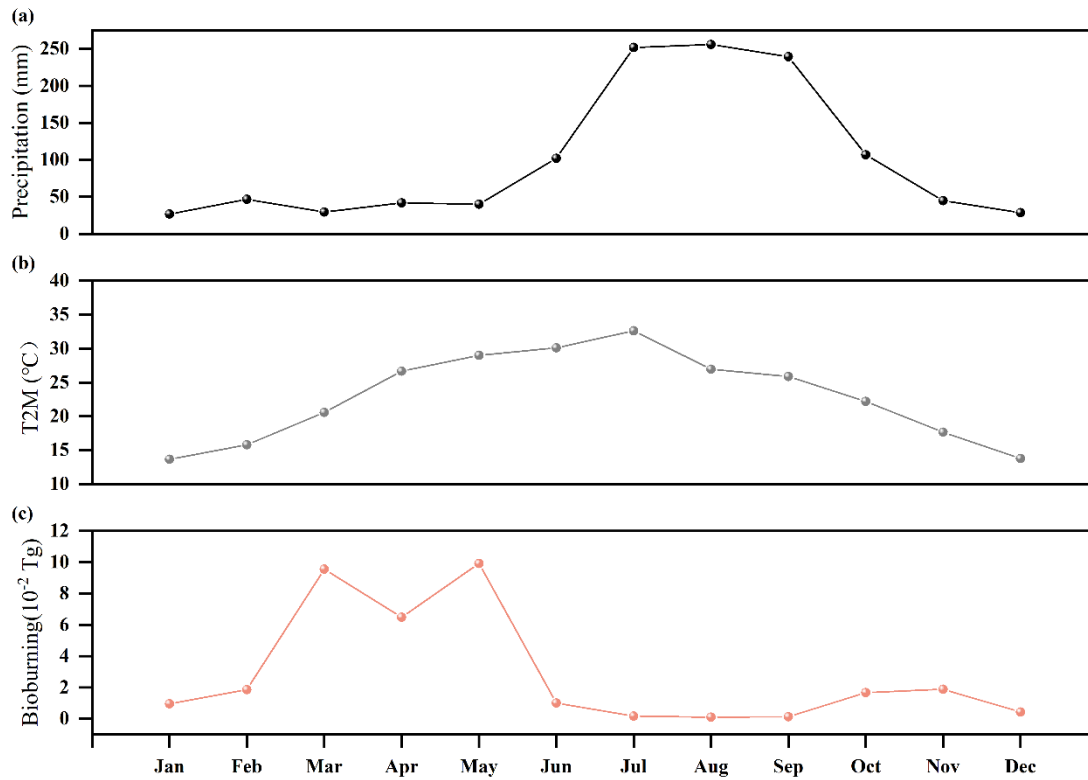

Figure S4. Monthly precipitation (a), temperature (b) from MERRA2 and biomass burning emission (c) from GFED4 in 2019.

**RC:** 39) *Spatial and Seasonal variation of ammonia emission: No posterior data in Fig.S3.*

**AR:** Thanks for comment. We have now added the posterior data to Figure S3 as requested.

**Figure in manuscript:**

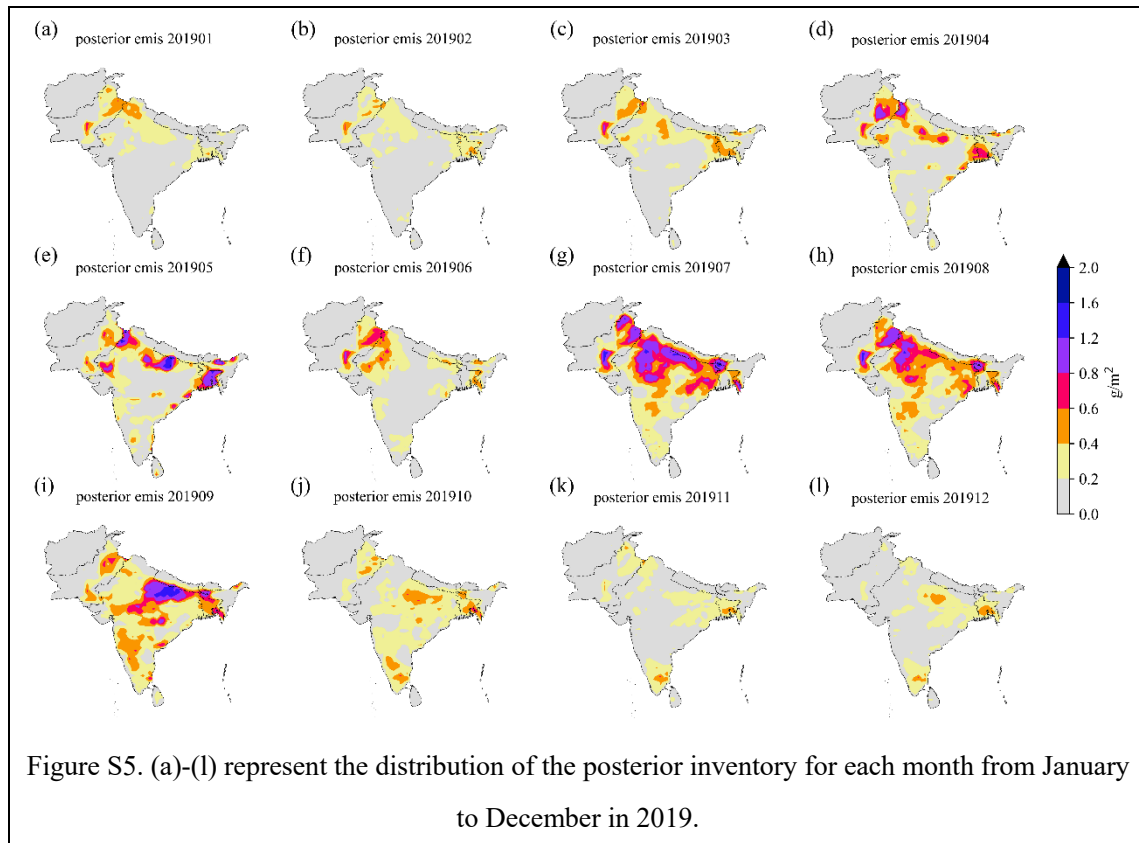

Supplement: Supplementary file [file egusphere-2024-3938-AC1-supplement.pdf]
