# Supplementary material for: South Asia ammonia emission inversion through assimilating IASI observations
Source: Copernicus journal article supplement (doi:10.5194/egusphere-2024-3938), 2025-01-20
Supplement: Supplementary file 1 [file egusphere-2024-3938-supplement.pdf]

## 1 Minimization of the Cost Function in 4DEnVar

The minimization of the cost function follows the 4DEnVar processes. An ensemble of emission inventory is generated randomly using the prior emission vector  $f_h$  and the assumed emission error covariance  $\mathbf{B}$  :

$$[\mathbf{f}_1, \dots, \mathbf{f}_N] \quad (\text{S1})$$

5 An ensemble of GEOS-Chem model simulations then forward with the ensemble emission inventories in parallel:

$$[\mathcal{M}(\mathbf{f}_1), \dots, \mathcal{M}(\mathbf{f}_N)] \quad (\text{S2})$$

Denote the emission ensemble perturbation matrix by:

$$\mathbf{F}' = \frac{1}{\sqrt{N-1}} [\mathbf{f}_1 - \bar{\mathbf{f}}, \dots, \mathbf{f}_N - \bar{\mathbf{f}}] \quad (\text{S3})$$

and mean of ensemble simulation by:

$$10 \quad \overline{\mathcal{M}(\mathbf{f})} = \frac{1}{N} \sum_{i=1}^N \mathcal{M}(\mathbf{f}_i) \quad (\text{S4})$$

where  $f$  is the mean of the ensemble emission inventories. In the 4DEnVar assimilation algorithm, the optimal emission  $f$  is defined as weighted sum of the columns of the perturbation matrix  $\mathbf{F}'$  using weights from a control variable vector  $\mathbf{w}$  :

$$\mathbf{f} = \bar{\mathbf{f}} + \mathbf{F}'\mathbf{w} \quad (\text{S5})$$

The cost function could then be reformulated as:

$$15 \quad \mathcal{J}(\mathbf{w}) = \frac{1}{2} \mathbf{w}^T \mathbf{w} + \frac{1}{2} \left\{ \mathbf{H}\mathbf{M}'\mathbf{w} + \mathbf{H}\overline{\mathcal{M}(\mathbf{f})} - \mathbf{y} \right\}^T \mathbf{O}^{-1} \left\{ \mathbf{H}\mathbf{M}'\mathbf{w} + \mathbf{H}\overline{\mathcal{M}(\mathbf{f})} - \mathbf{y} \right\} \quad (\text{S6})$$

here  $\mathbf{M}$  is the linearization of the GEOS-Chem ammonia simulating model required for cost function minimization, and is approximated by:

$$\mathbf{M}\mathbf{F}' \approx \frac{1}{\sqrt{N}} \left[ \mathcal{M}(f_1) - \overline{\mathcal{M}(f)}, \dots, \mathcal{M}(f_N) - \overline{\mathcal{M}(f)} \right] \quad (\text{S7})$$

20 with the uncertainty in emission transferred into the observations space, the minimum of the cost function in Eq.(S6) could then be directly calculated, and the posterior emission  $f$  subsequently be updated.

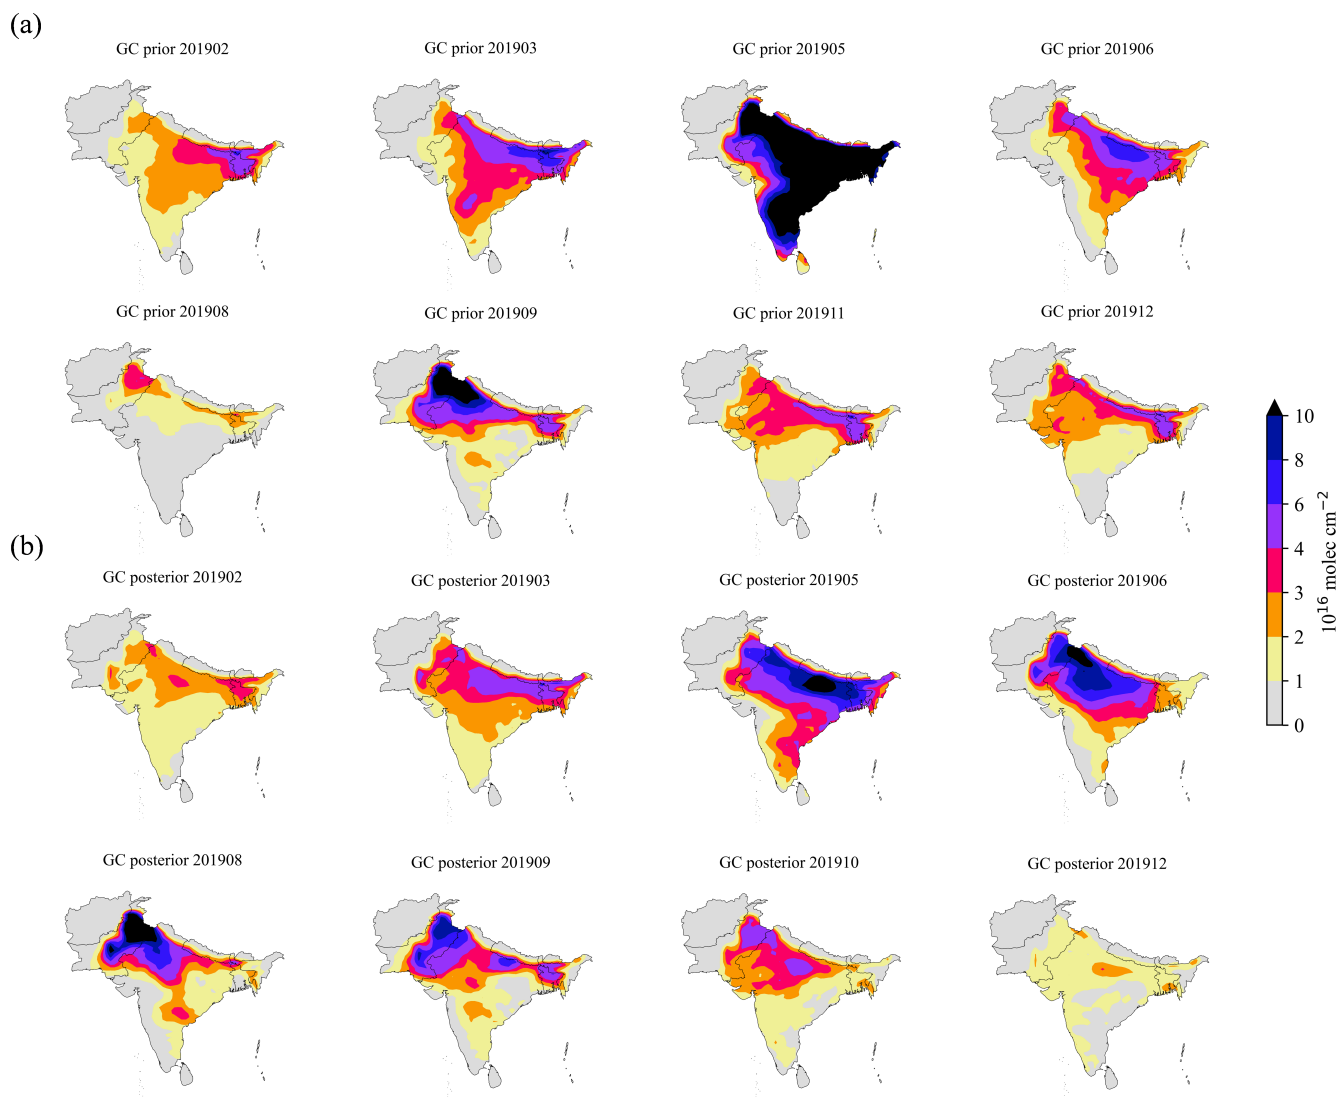

**Figure S1.** The distribution of the prior (a) and the posterior (b) ammonia total column for the remain months in 2019.

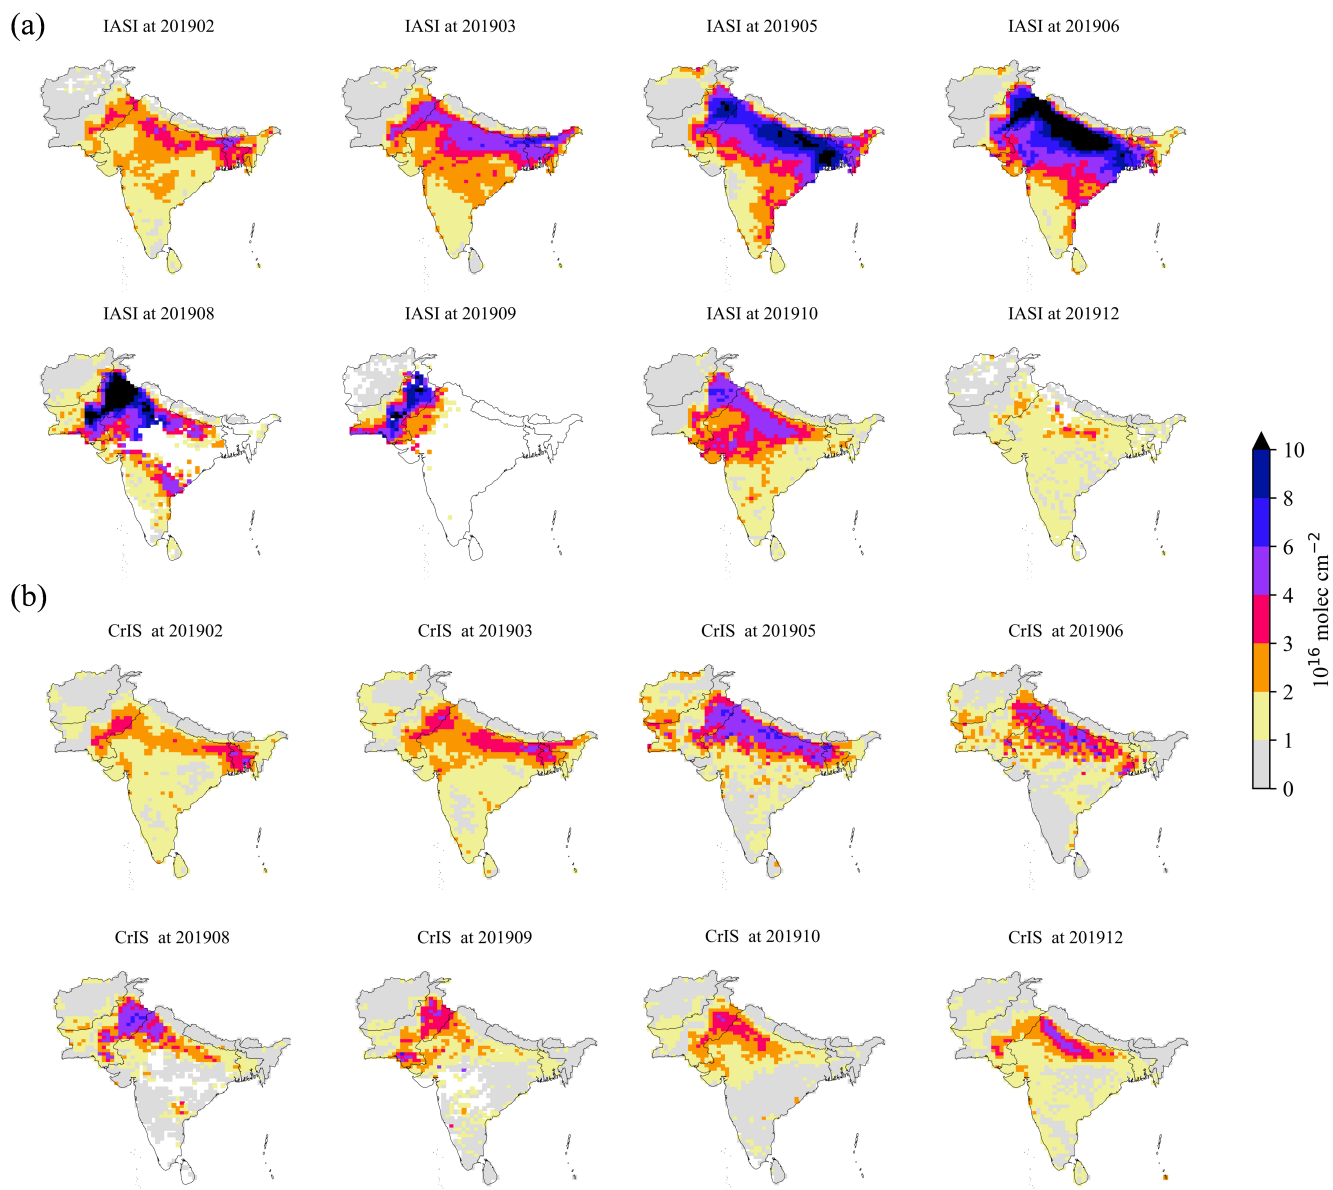

**Figure S2.** The distribution of the IASI-observed (a) and the CrIS-observed (b) ammonia total column for the remain months in 2019.

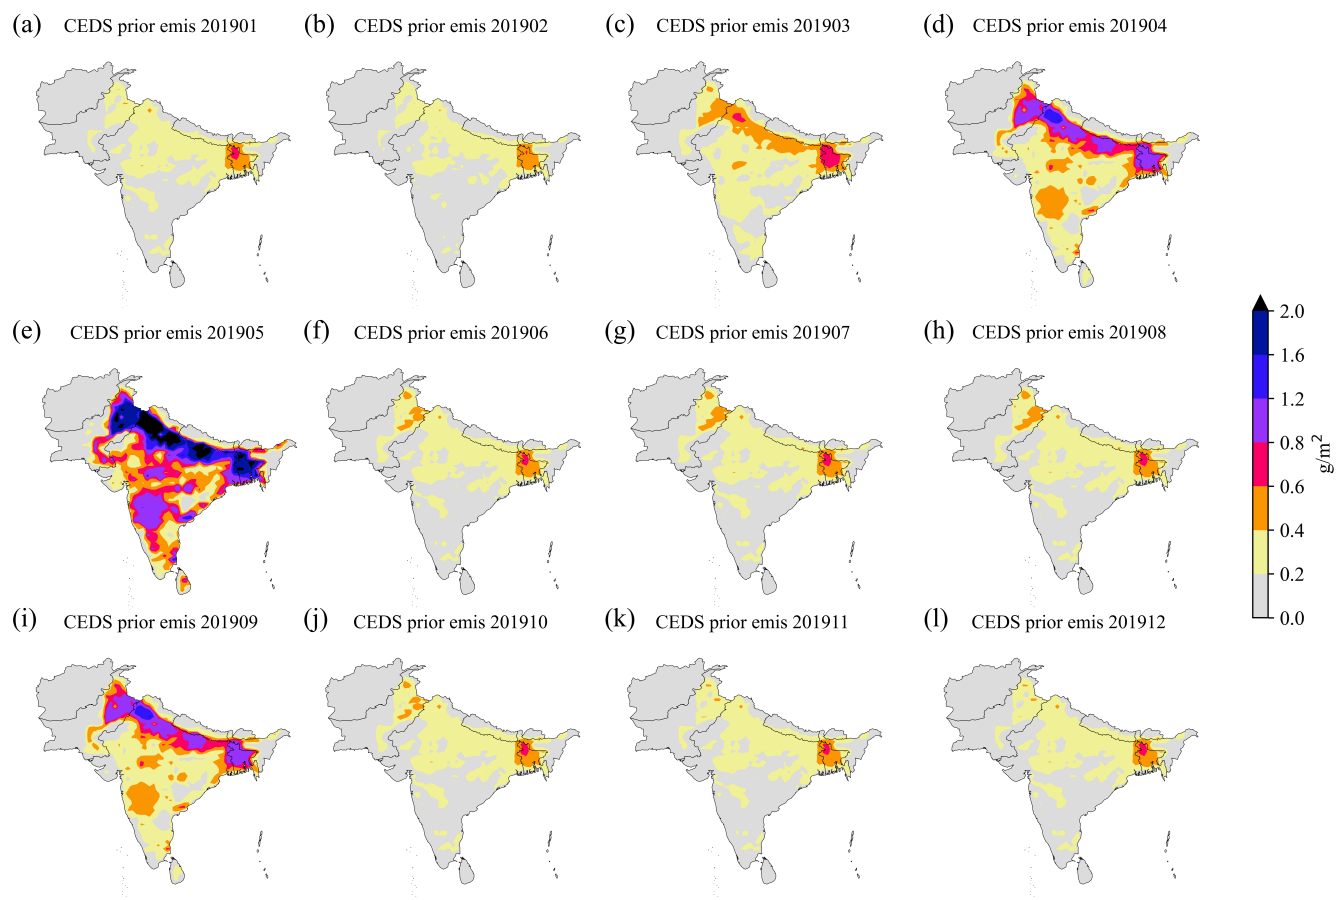

**Figure S3.** (a)-(l) represent the distribution of the prior inventory for each month from January to December in 2019.

(a)NH<sub>3</sub> emission increments at 201901 (b)NH<sub>3</sub> emission increments at 201902 (c)NH<sub>3</sub> emission increments at 201903 (d)NH<sub>3</sub> emission increments at 201904

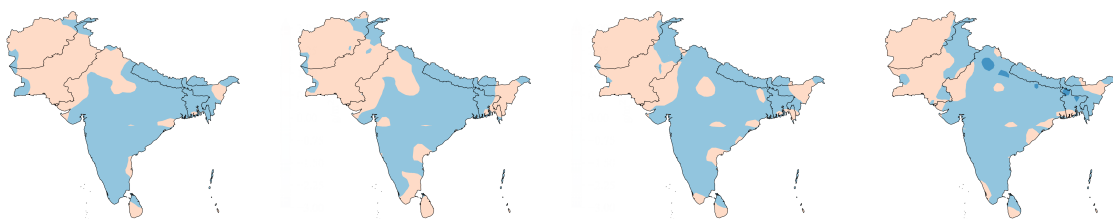

(e)NH<sub>3</sub> emission increments at 201905 (f) NH<sub>3</sub> emission increments at 201906 (g)NH<sub>3</sub> emission increments at 201907 (h)NH<sub>3</sub> emission increments at 201908

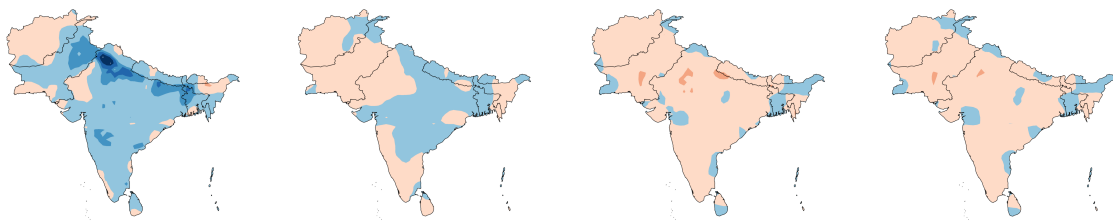

(i) NH<sub>3</sub> emission increments at 201909 (j) NH<sub>3</sub> emission increments at 201910 (k)NH<sub>3</sub> emission increments at 201911 (l) NH<sub>3</sub> emission increments at 201912

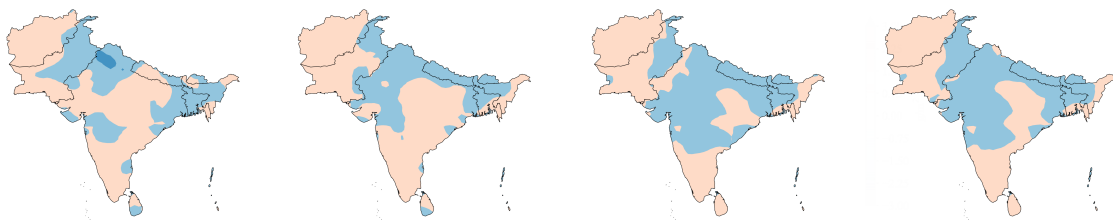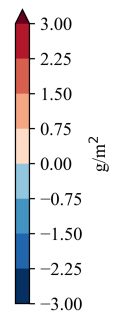

**Figure S4.** (a)-(l) represent the distribution of increments obtained by subtracting the prior inventory from the posterior inventory for each month from January to December in 2019.
